# Supplementary material for: Pd–ZnO nanowire arrays as recyclable catalysts for 4-nitrophenol reduction and Suzuki coupling reactions
Source: Royal Society of Chemistry journal article supplement (doi:10.1039/c6ra28467a), 2017-01-01
Supplement: c6ra28467a1.pdf [file c6ra28467a1.pdf]

## Supporting Information

# Pd-ZnO Nanowire Arrays as Recyclable Catalysts for 4-Nitrophenol Reduction and Suzuki Coupling Reactions

Qiyang Hu,<sup>a,b</sup> Xiaowang Liu,<sup>\*a</sup> Lin Tang,<sup>a,b</sup> Dewen Min,<sup>a</sup> Tianchao Shi<sup>a</sup> and Wu Zhang<sup>\*a</sup>

<sup>a</sup>College of Chemistry and Materials Science, Anhui Normal University, Key Laboratory of Functional Molecular Solids, Ministry of Education, Anhui Laboratory of Molecule-Based Materials, Wuhu 241000, P.R. China

<sup>b</sup>School of Pharmacy, Wannan Medical College, Wuhu 241002, P.R. China

E-mail: zhangwu@mail.ahnu.edu.cn; xwliu601@mail.ahnu.edu.cn

## Content

|                                                                             |       |
|-----------------------------------------------------------------------------|-------|
| Characterization of ZnO@Zn and Pd-ZnO nanowire arrays                       | 2-3   |
| Additional data on Pd-ZnO@Zn nanowire arrays toward 4-nitrophenol reduction | 4     |
| Characterization of recycled Pd-ZnO@Zn nanowire arrays                      | 5     |
| Characterization data for the products                                      | 6-11  |
| <sup>1</sup> H and <sup>13</sup> C NMR spectra of the products              | 12-38 |
| References                                                                  | 39    |

## Characterization of ZnO@Zn and Pd-ZnO@Zn nanowire arrays

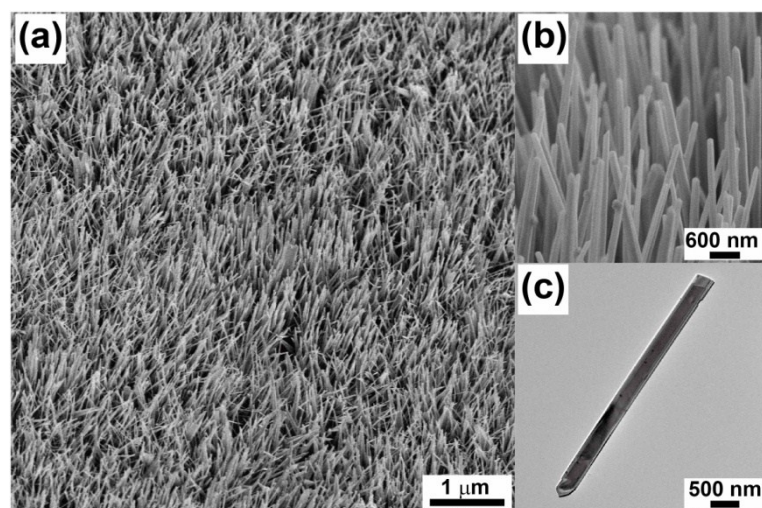

**Figure S1.** (a and b) Representative SEM images of as-prepared ZnO@Zn nanowire arrays for Pd nanoparticle loading and (c) TEM image of a single ZnO nanowire removed from the nanowire arrays by sonication.

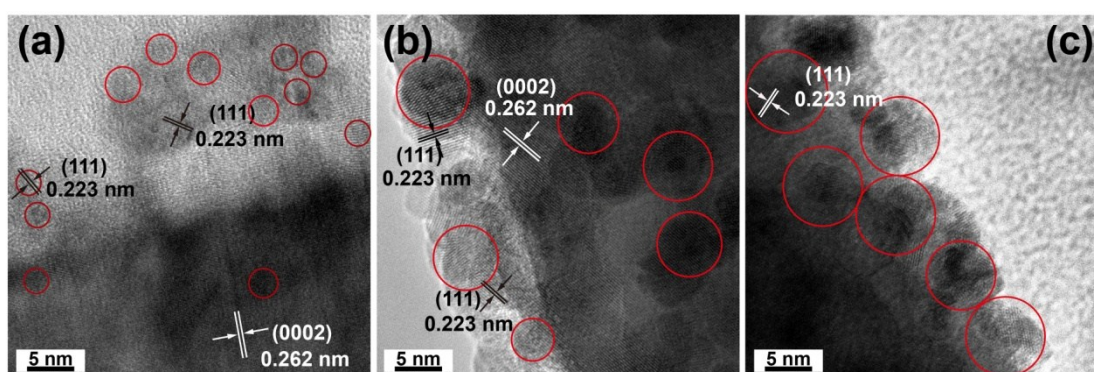

**Figure S2.** HRTEM images of Pd-ZnO nanowire arrays obtained by immersing ZnO@Zn nanowire arrays into an aqueous solution of  $\text{Na}_2\text{PdCl}_4$  (5 mM) for different periods of time: (a) 5 s; (b) 15 s; and (c) 25 s.

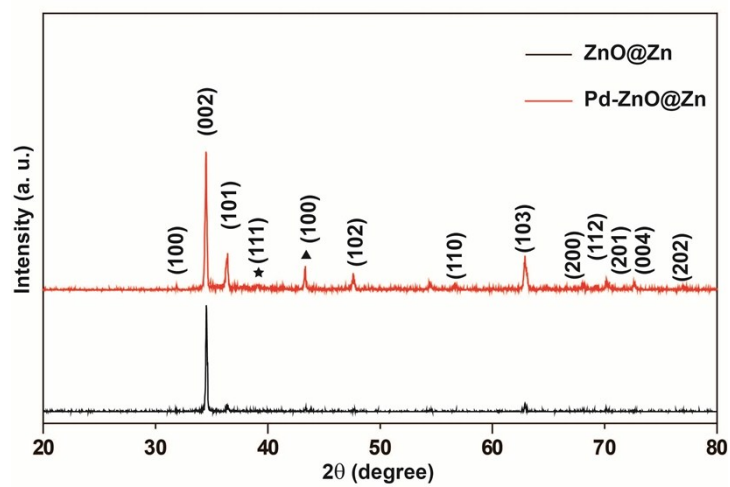

**Figure S3.** XRD patterns of ZnO nanowire arrays before and after the growth of Pd NPs. Note that the diffraction patterns for Pd and Zn (from the substrate) are labeled with “★” and “▲”, respectively.

Additional data on Pd-ZnO@Zn nanowire arrays toward 4-nitrophenol reduction

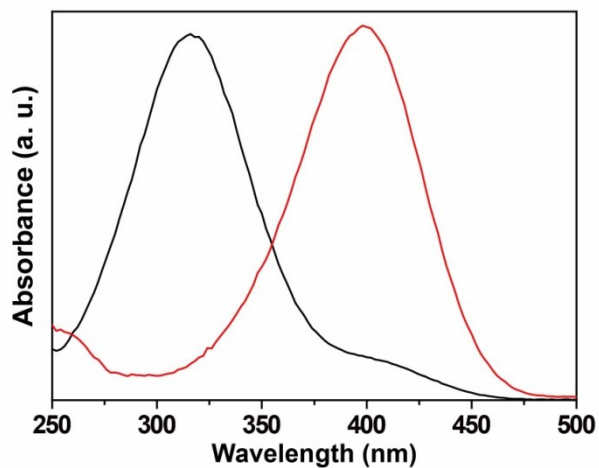

**Figure S4.** UV-vis spectra of 4-nitrophenol before (black curve) and after (red curve) the addition of NaBH<sub>4</sub> solution.

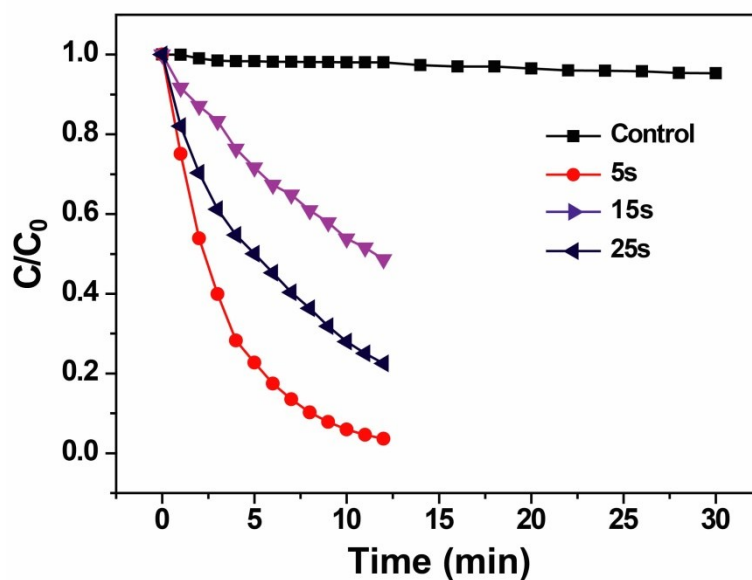

**Figure S5.** A comparison of the catalytic performance of ZnO@Zn nanowire arrays and Pd-ZnO nanowire arrays prepared by immersing ZnO@Zn nanowire arrays in a Na<sub>2</sub>PdCl<sub>4</sub> solution for 5, 15 and 25 s.

### Characterization of recycled Pd-ZnO@Zn nanowire arrays

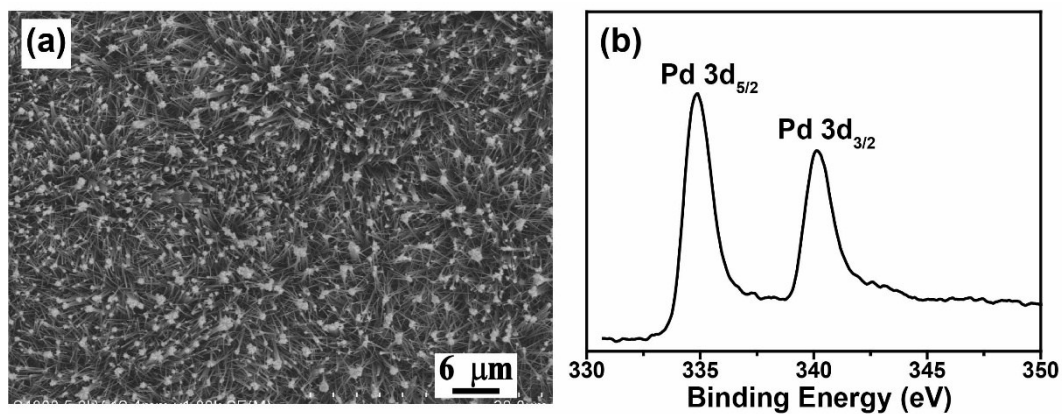

**Figure S6.** (a) SEM image and (b) XPS profile (Pd 3d) of as-prepared Pd NP-ZnO nanowire arrays after recycled use for 10 times toward 4-nitrophenol reduction.

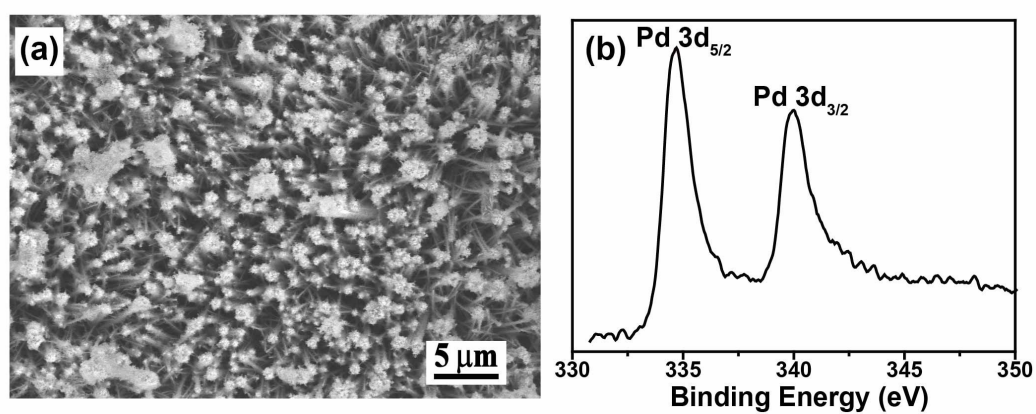

**Figure S7.** (a) SEM image and (b) XPS profile (Pd 3d) of as-prepared Pd nanoparticle-ZnO nanowire arrays after recycled use for 3 times toward Suzuki reaction.

## Characterization data for the products

### Biphenyl (1a)

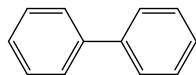

White solid; m.p. 67–68 °C (lit. m.p. 69-70 °C <sup>[1]</sup>); <sup>1</sup>H NMR (300 MHz, CDCl<sub>3</sub>) δ 7.59 (d, *J* = 7.8Hz, 4H), 7.45-7.40 (m, 4H), 7.36-7.31 (m, 2H); <sup>13</sup>C NMR (75 MHz, CDCl<sub>3</sub>) δ 141.3, 128.8, 127.3, 127.2.

### 4-Methoxybiphenyl (1b)

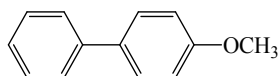

White solid; m.p. 88–89 °C (lit. m.p. 89-90 °C <sup>[1]</sup>); <sup>1</sup>H NMR (300 MHz, CDCl<sub>3</sub>) δ 7.56-7.51 (m, 4H), 7.41 (t, *J* = 7.2Hz, 2H), 7.32-7.30 (m, 1H), 6.97 (d, *J* = 8.4Hz, 2H), 3.84(s, 3H); <sup>13</sup>C NMR (75 MHz, CDCl<sub>3</sub>) δ 159.5, 141.2, 134.1, 129.1, 128.6, 127.1, 127.1, 114.6, 55.7.

### 4-Chlorobiphenyl (1c)

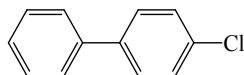

White solid; m.p. 77-78 °C (lit. m.p. 78-78.5 °C <sup>[2]</sup>); <sup>1</sup>H NMR (300 MHz, CDCl<sub>3</sub>) δ 7.56-7.49 (m, 4H), 7.46-7.33 (m, 5H); <sup>13</sup>C NMR (75 MHz, CDCl<sub>3</sub>) δ 140.0, 139.7, 133.4, 128.9, 128.9, 128.4, 127.6, 127.0.

### 4-Methylbiphenyl (1d)

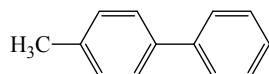

White solid; m.p. 46-47 °C (lit. m.p. 46-47 °C <sup>[1]</sup>); <sup>1</sup>H NMR (300 MHz, CDCl<sub>3</sub>) δ 7.57 (d, *J* = 7.2Hz, 2H), 7.49 (d, *J* = 8.1Hz, 2H), 7.44-7.39 (m, 2H), 7.34-7.31 (m, 1H), 7.25-7.21 (m, 2H), 2.39 (s, 3H); <sup>13</sup>C NMR (75 MHz, CDCl<sub>3</sub>) δ 141.2, 138.4, 137.1, 129.5, 128.8, 127.0, 127.0, 21.2.

### 4-Methoxy-4'-methylbiphenyl (1e)

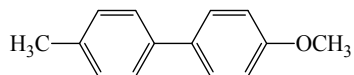

White solid; m.p. 109-111 °C (lit. m.p. 108-109 °C <sup>[3]</sup>); <sup>1</sup>H NMR (300 MHz, CDCl<sub>3</sub>) δ 7.52-7.43 (m, 4H), 7.22 (d, *J* = 7.8Hz, 2H), 6.96 (d, *J* = 8.4Hz, 2H), 3.84 (s, 3H), 2.38 (s, 3H); <sup>13</sup>C NMR (75 MHz, CDCl<sub>3</sub>) δ 158.9, 138.0, 136.4, 133.7, 129.5, 128.0, 126.6, 114.2, 55.4, 21.1.

### 4-Chloro-4'-methoxybiphenyl (1f)

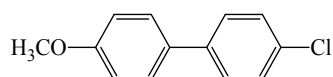

White solid; m.p. 110-112 °C (lit. m.p. 115-115.5 °C [2]); <sup>1</sup>H NMR (300 MHz, CDCl<sub>3</sub>) δ 7.48-7.44 (m, 4H), 7.35 (d, *J* = 8.4Hz, 2H), 6.95 (d, *J* = 8.7Hz, 2H), 3.82 (s, 3H); <sup>13</sup>C NMR (75 MHz, CDCl<sub>3</sub>) δ 159.4, 139.3, 132.7, 132.5, 128.9, 128.0, 128.0, 114.3, 55.4.

#### 4'-Methoxybiphenyl-4-carbonitrile (1g)

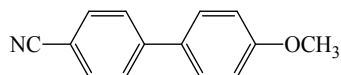

White solid; m.p. 101-103 °C (lit. m.p. 103-105 °C [4]); <sup>1</sup>H NMR (300 MHz, CDCl<sub>3</sub>) δ 7.70-7.62 (m, 4H), 7.54(d, *J* = 8.4Hz, 2H), 7.00(d, *J* = 8.7Hz, 2H), 3.86 (s, 3H); <sup>13</sup>C NMR (75 MHz, CDCl<sub>3</sub>) δ 160.6, 145.6, 133.0, 131.8, 128.8, 127.5, 119.5, 114.9, 110.4, 55.8.

#### 4'-Chlorobiphenyl-4-carbonitrile (1h)

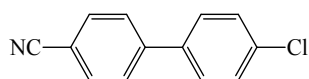

White solid; m.p. 125-126 °C (lit. m.p. 125-126 °C [2]); <sup>1</sup>H NMR (300 MHz, CDCl<sub>3</sub>) δ 7.66 (d, *J* = 8.4Hz, 2H), 7.57(d, *J* = 8.4Hz, 2H), 7.45 (d, *J* = 8.4Hz, 2H), 7.37(d, *J* = 8.7Hz, 2H); <sup>13</sup>C NMR (75 MHz, CDCl<sub>3</sub>): δ 144.4, 137.6, 135.0, 132.7, 129.3, 128.5, 127.6, 118.8, 111.3.

#### Ethyl biphenyl-4-carboxylate (1i)

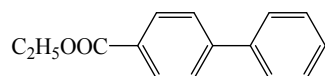

White solid; m.p. 48-49 °C (lit. m.p. 49-50 °C [5]); <sup>1</sup>H NMR (300 MHz, CDCl<sub>3</sub>) δ 8.12 (d, *J* = 8.1Hz, 2H), 7.67-7.61 (m, 4H), 7.49-7.39 (m, 3H), 4.40 (q, *J* = 6.9 Hz, 2H), 1.41 (t, *J* = 6.9 Hz, 3H); <sup>13</sup>C NMR (75 MHz, CDCl<sub>3</sub>) δ 166.9, 145.9, 140.4, 130.4, 129.6, 129.3, 128.5, 127.7, 127.4, 61.4, 14.8.

#### 1-([1, 1'-biphenyl]-4-yl)ethanone (1j)

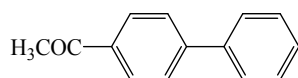

White solid; m.p. 118-120 °C (lit. m.p. 122-123 °C [3]); <sup>1</sup>H NMR (300 MHz, CDCl<sub>3</sub>) δ 8.02 (d, *J* = 8.1Hz, 2H), 7.68-7.60(m, 4H), 7.48-7.39 (m, 3H), 2.62 (s, 3H); <sup>13</sup>C NMR (75 MHz, CDCl<sub>3</sub>) δ 198.1, 146.2, 140.3, 136.3, 129.4, 129.3, 128.6, 127.7, 127.6, 27.0.

#### 4'-Methoxybiphenyl-4-carbaldehyde (1k)

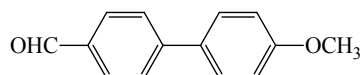

White solid; m.p. 101-102 °C (lit. m.p. 100-101 °C [6]); <sup>1</sup>H NMR (300 MHz, CDCl<sub>3</sub>, 25 °C): δ 10.03 (s, 1H), 7.93 (d, *J* = 8.1Hz, 2H), 7.71 (d, *J* = 8.1Hz, 2H), 7.59 (d, *J* = 8.7, 2H), 7.01 (d, *J* = 8.7, 2H), 3.87 (s, 3H); <sup>13</sup>C NMR (75 MHz, CDCl<sub>3</sub>) δ 192.0, 160.1, 146.8, 134.7, 132.0, 130.3, 128.5, 127.1, 114.5, 55.4.

## 2-Methoxybiphenyl (1l)

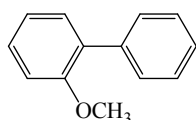

White solid; m.p. 28-30 °C (lit. m.p. 29-30 °C [1]); <sup>1</sup>H NMR (300 MHz, CDCl<sub>3</sub>) δ 7.54-7.51 (m, 2H), 7.42-7.28 (m, 5H), 7.04-6.95 (m, 2H), 3.77(s, 3H); <sup>13</sup>C NMR (75 MHz, CDCl<sub>3</sub>) δ 156.5, 138.6, 131.0, 130.8, 129.6, 128.7, 128.1, 127.0, 120.9, 111.3, 55.6.

## 4'-Chloro-2-methoxybiphenyl (1m)

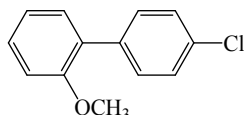

White solid; m.p. 52-54 °C (lit. m.p. 50-52 °C [7]); <sup>1</sup>H NMR (300 MHz, CDCl<sub>3</sub>) δ 7.46 (d, *J* = 8.4Hz, 2H), 7.37-7.26 (m, 4H), 7.04-6.95 (m, 2H), 3.79(s, 3H); <sup>13</sup>C NMR (75 MHz, CDCl<sub>3</sub>) δ 156.4, 137.0, 132.9, 130.9, 130.7, 129.4, 129.0, 128.2, 120.9, 111.2, 55.6.

## 4, 4''-dimethoxy-1,1':2',1''-terphenyl (1n)

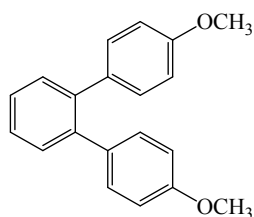

White solid; m.p. 102-104 °C (lit. m.p. 107-108 °C [8]); <sup>1</sup>H NMR (300 MHz, CDCl<sub>3</sub>) δ 7.37 (m, 4H), 7.06 (d, *J* = 8.4Hz, 4H), 6.76 (d, *J* = 8.4Hz, 4H), 3.77(s, 6H); <sup>13</sup>C NMR (75 MHz, CDCl<sub>3</sub>) δ 158.2, 140.1, 134.1, 130.9, 130.6, 127.2, 113.4, 55.2.

## 4-(4-Trifluoromethylphenyl)anisole (1o)

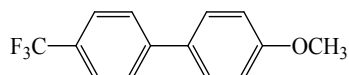

White solid; m.p. 120-122 °C (lit. m.p. 121-122 °C [1]); <sup>1</sup>H NMR (300 MHz, CDCl<sub>3</sub>) δ 7.65 (m, 4H), 7.54(d, *J* = 8.4 Hz, 2H), 7.00 (d, *J* = 8.7 Hz, 2H), 3.86 (s, 3H); <sup>13</sup>C NMR (75 MHz, CDCl<sub>3</sub>) δ 159.9, 144.3, 132.1, 128.7 (q, *J*<sub>CF</sub> = 32.25Hz), 128.4, 126.9, 125.7 (q, *J*<sub>CF</sub> = 3.75Hz), 124.4 (q, *J*<sub>CF</sub> = 270Hz), 114.4, 55.3.

## 3-(4-Methoxyphenyl) pyridine (1p)

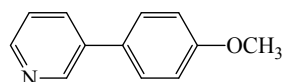

White solid; m.p. 62-63 °C (lit. m.p. 62-64 °C [3]); <sup>1</sup>H NMR (300 MHz, CDCl<sub>3</sub>) δ 8.82 (s, 1 H), 8.54 (d, *J* = 3.6 Hz, 1 H), 7.82 (d, *J* = 7.8 Hz, 1 H), 7.51 (d, *J* = 8.7 Hz, 2 H), 7.35-7.31 (m, 1 H), 7.00 (d, *J* = 8.7 Hz, 2 H), 3.84(s, 3 H); <sup>13</sup>C NMR (75 MHz, CDCl<sub>3</sub>) δ 159.8, 147.8, 147.7, 136.3, 133.9, 130.2, 128.2, 123.6, 114.6, 55.4.



### Benzophenone (2a)

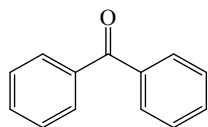

White solid; m.p. 48-49 °C (lit. m.p. 46-47 °C <sup>[9]</sup>); <sup>1</sup>H NMR (300 MHz, CDCl<sub>3</sub>) δ 7.81-7.79 (m, 4 H), 7.61-7.56 (m, 2 H), 7.51- 7.46 (m, 4 H); <sup>13</sup>C NMR (75 MHz, CDCl<sub>3</sub>) δ 196.8, 137.6, 132.4, 130.1, 128.3.

### (4-Methoxyphenyl)(phenyl)methanone (2b)

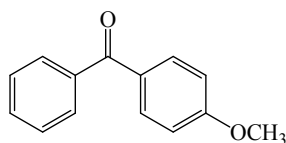

White solid; m.p. 58-60 °C (lit. m.p. 59-60 °C <sup>[9]</sup>); <sup>1</sup>H NMR (300 MHz, CDCl<sub>3</sub>) δ 7.83 (d, *J* = 8.7Hz, 2H), 7.75 (d, *J* = 7.2Hz, 2H), 7.56 (t, *J* = 7.2Hz, 1H), 7.47 (t, *J* = 7.2Hz, 2H), 6.96 (d, *J* = 9.0Hz, 2H), 3.88 (s, 3H); <sup>13</sup>C NMR (75 MHz, CDCl<sub>3</sub>) δ 195.9, 163.6, 138.7 132.9, 132.2, 130.6, 130.1, 128.6, 114.0, 55.9.

### (4-Chlorophenyl)(phenyl)methanone (2c)

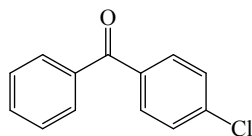

White solid; m.p. 72-73 °C (lit. m.p. 74.3-74.7 °C <sup>[10]</sup>); <sup>1</sup>H NMR (300 MHz, CDCl<sub>3</sub>) δ 7.79-7.74 (m, 4H), 7.63-7.58 (m, 1H), 7.51-7.45 (m, 4H); <sup>13</sup>C NMR (75 MHz, CDCl<sub>3</sub>) δ 195.5, 138.9, 137.3, 135.9, 132.6, 131.4, 129.9, 128.6, 128.4.

### Phenyl(p-tolyl)methanone (2d)

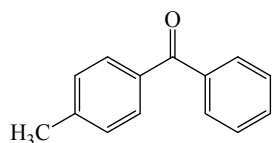

White solid; m.p. 57-58 °C (lit. m.p. 57-58 °C <sup>[9]</sup>); <sup>1</sup>H NMR (300 MHz, CDCl<sub>3</sub>) δ 7.78-7.75 (m, 2H), 7.71 (d, *J* = 8.1 Hz, 2H), 7.56 (t, *J* = 7.2Hz, 1H), 7.48-7.43 (m, 2H), 7.27-7.24 (m, 2H), 2.42 (s, 3H); <sup>13</sup>C NMR (75 MHz, CDCl<sub>3</sub>) δ 196.5, 143.2, 138.0, 134.9, 132.2, 130.3, 129.9, 129.0, 128.2, 21.7.

### (4-Methoxyphenyl)(p-tolyl)methanone (2e)

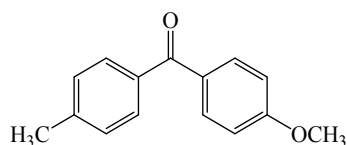

White solid; m.p. 75-77 °C (lit. m.p. 76.3-77 °C [10]); <sup>1</sup>H NMR (500 MHz, CDCl<sub>3</sub>) δ 7.81 (d, *J* = 8.5, 2H), 7.68 (d, *J* = 8.0, 2H), 7.27 (d, *J* = 8.0, 2H), 6.96 (d, *J* = 9.0, 2H), 3.88 (s, 3H), 2.44 (s, 3H); <sup>13</sup>C NMR (125 MHz, CDCl<sub>3</sub>) δ 195.7, 163.4, 143.0, 136.0, 132.8, 130.9, 130.4, 129.3, 113.9, 55.8, 22.0.

#### 4-Benzoylbenzonitrile (2f)

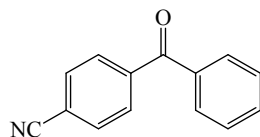

White solid; m.p. 110-112 °C (lit. m.p. 110-111 °C [9]); <sup>1</sup>H NMR (300 MHz, CDCl<sub>3</sub>) δ 7.88(d, *J* = 8.4Hz, 2H), 7.81-7.78(m, 4H), 7.65(t, *J* = 7.5Hz, 1H), 7.52(t, *J* = 7.5Hz, 2H); <sup>13</sup>C NMR (75 MHz, CDCl<sub>3</sub>) δ 195.0, 141.2, 136.3, 133.3, 132.2, 130.2, 130.1, 128.6, 118.0, 115.6.

#### 4-(4-Methoxybenzoyl)benzonitrile (2g)

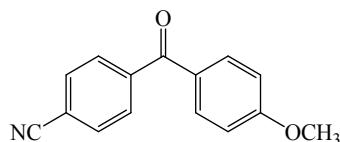

White solid; m.p. 129-131 °C (lit. m.p. 129.3-130.1 °C [10]); <sup>1</sup>H NMR (300 MHz, CDCl<sub>3</sub>) δ 7.84-7.76 (m, 6H), 6.99 (d, *J* = 8.7, 2H), 3.90 (s, 3H); <sup>13</sup>C NMR (75 MHz, CDCl<sub>3</sub>) δ 193.7, 163.9, 142.1, 132.6, 132.1, 129.9, 129.0, 118.1, 115.1, 113.9, 55.6.

#### Ethyl 4-benzoylbenzoate (2h)

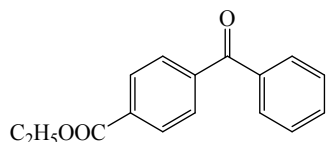

Colorless oil [11]; <sup>1</sup>H NMR (300 MHz, CDCl<sub>3</sub>) δ 8.14 (d, *J* = 8.1 Hz, 2H), 7.83-7.78 (m, 4H), 7.62-7.58 (m, 1H), 7.50-7.45 (m, 2H), 4.41 (q, *J* = 7.2 Hz, 2H), 1.41 (t, *J* = 7.2 Hz, 3H); <sup>13</sup>C NMR (75 MHz, CDCl<sub>3</sub>) δ 196.0, 165.8, 141.2, 137.0, 133.6, 132.9, 130.1, 129.7, 129.4, 128.4, 61.4, 14.3.

#### 1-(4-Benzoylphenyl)ethanone (2i)

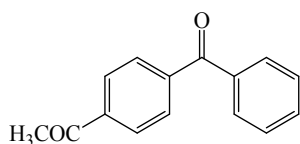

White solid; m.p. 82-84 °C (lit. m.p. 82-83 °C [9]); <sup>1</sup>H NMR (300 MHz, CDCl<sub>3</sub>) δ 8.06 (d, *J* = 8.1Hz, 2H), 7.87(d, *J* = 8.1Hz, 2H), 7.81(d, *J* = 7.2Hz, 2H), 7.63(t, *J* = 7.5Hz, 1H), 7.51(t, *J* = 7.5Hz, 2H), 2.67 (s, 3H); <sup>13</sup>C NMR (75 MHz, CDCl<sub>3</sub>) δ 197.5, 195.9, 141.4, 139.6, 137.0, 133.0, 130.1, 130.0, 128.5, 128.2, 26.9.

#### 4-(4-Methoxybenzoyl)benzaldehyde (2j)

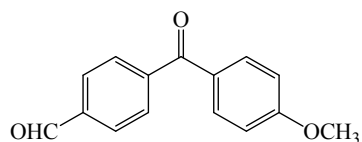

White solid; m.p. 100-103 °C (lit. m.p. 104-106 °C <sup>[12]</sup>); <sup>1</sup>H NMR (300 MHz, CDCl<sub>3</sub>) δ 10.13 (s, 1H), 8.00 (d, *J* = 7.8, 2H), 7.89-7.82 (m, 4H), 6.99 (d, *J* = 8.7, 2H), 3.90 (s, 3H); <sup>13</sup>C NMR (75 MHz, CDCl<sub>3</sub>) δ 194.5, 191.6, 163.8, 143.5, 138.2, 132.6, 130.0, 129.7, 129.4, 113.8, 55.6.

**(4-Methoxyphenyl)(pyridin-3-yl)methanone (2k)**

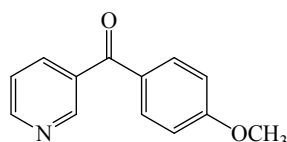

White solid; m.p. 96-98 °C (lit. m.p. 98-99 °C <sup>[13]</sup>); <sup>1</sup>H NMR (300 MHz, CDCl<sub>3</sub>) δ 8.96 (s, 1 H), 8.80 (d, *J* = 3.6 Hz, 1 H), 8.09 (d, *J* = 7.8 Hz, 1 H), 7.84 (d, *J* = 9.0 Hz, 2 H), 7.47-7.43 (dd, *J* = 4.8 Hz, 7.8 Hz, 1 H), 7.00 (d, *J* = 9.0 Hz, 2 H), 3.91 (s, 3 H); <sup>13</sup>C NMR (75 MHz, CDCl<sub>3</sub>) δ 193.4, 163.8, 152.3, 150.4, 137.0, 134.0, 132.5, 129.4, 123.4, 113.9, 55.6.

# $^1\text{H}$ and $^{13}\text{C}$ NMR spectra of the products

## Biphenyl (1a)

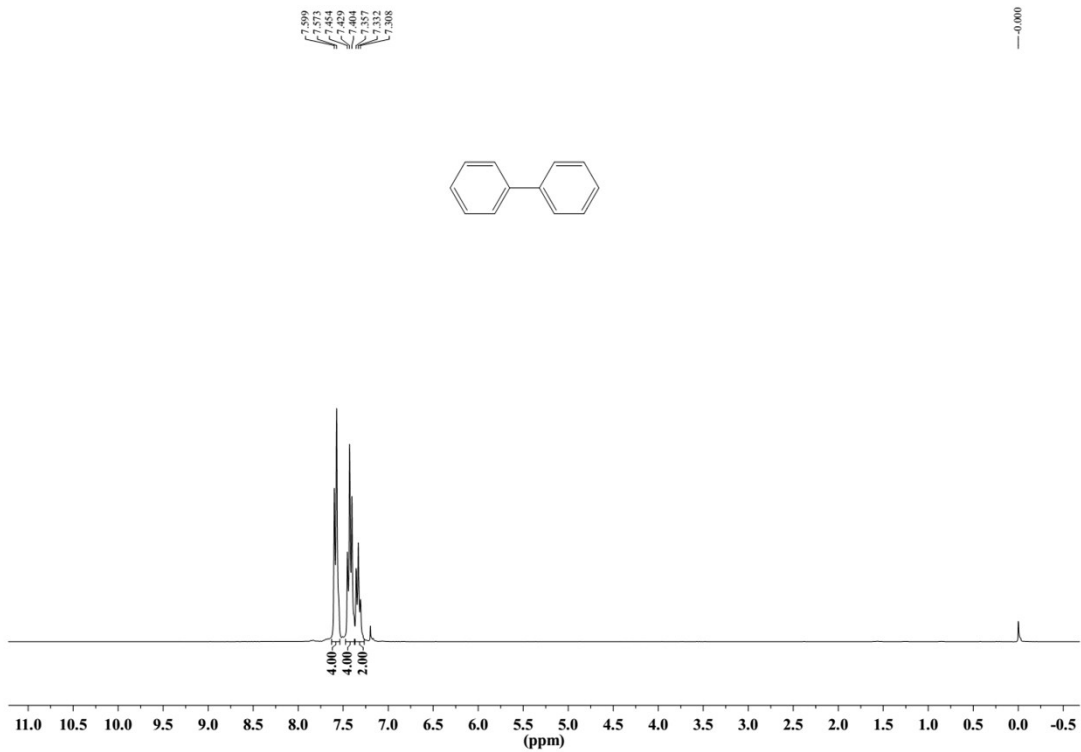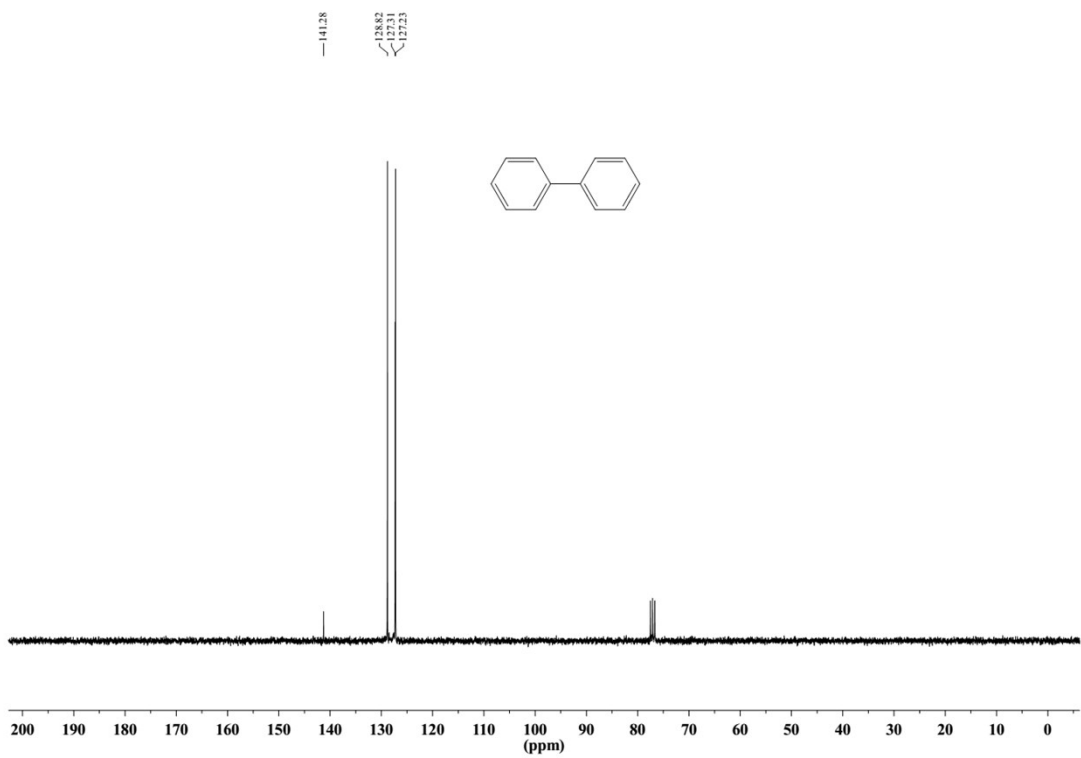

# 4-Methoxybiphenyl (1b)

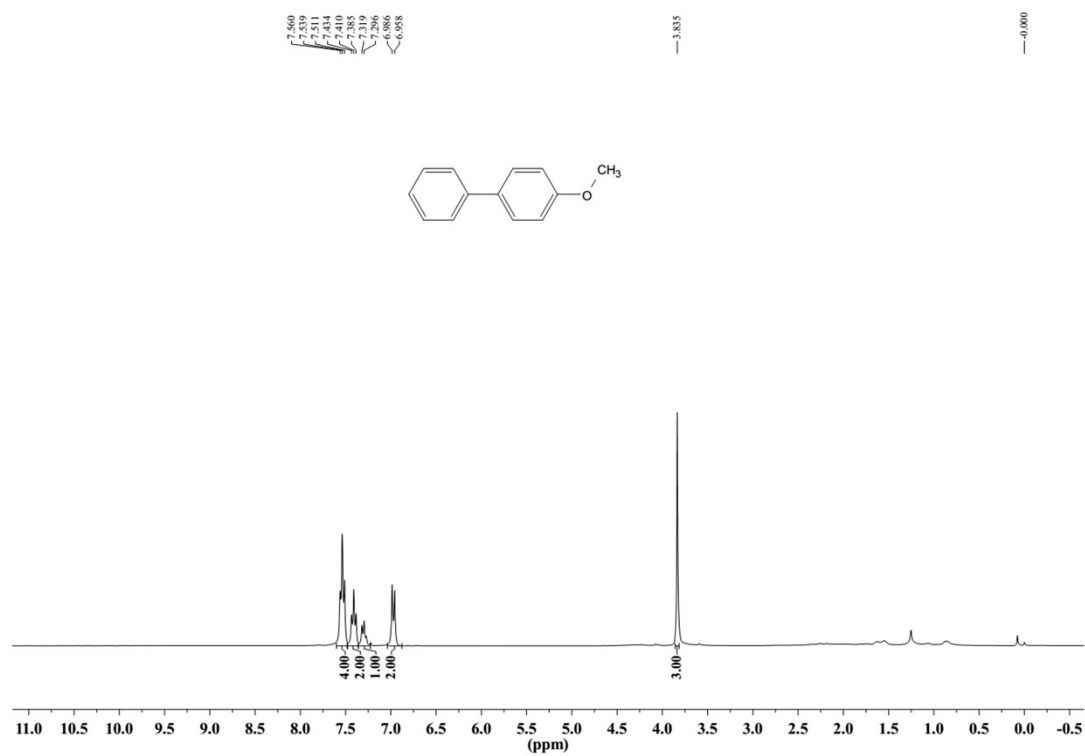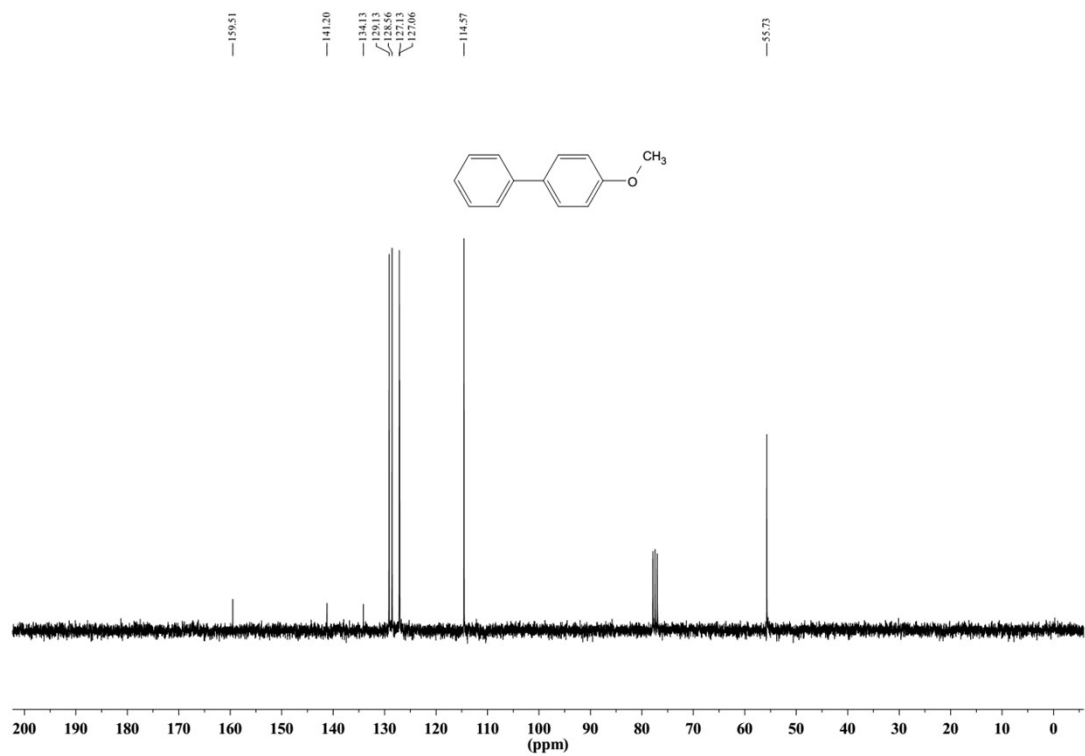

# 4-Chlorobiphenyl (1c)

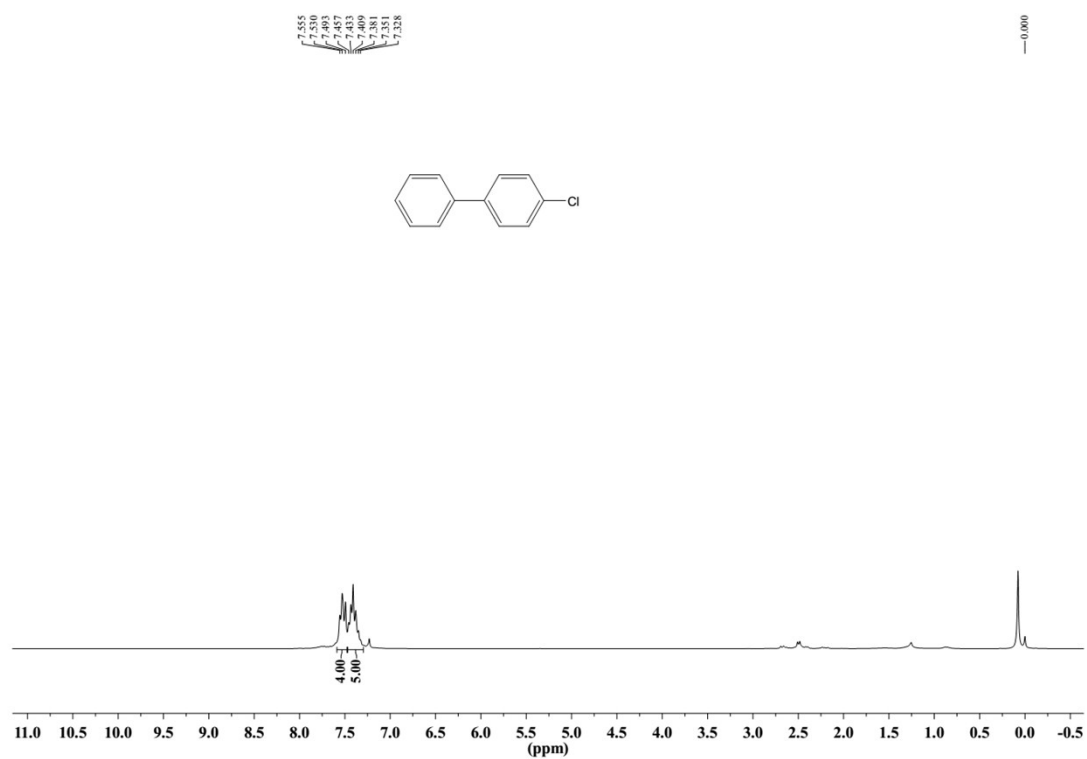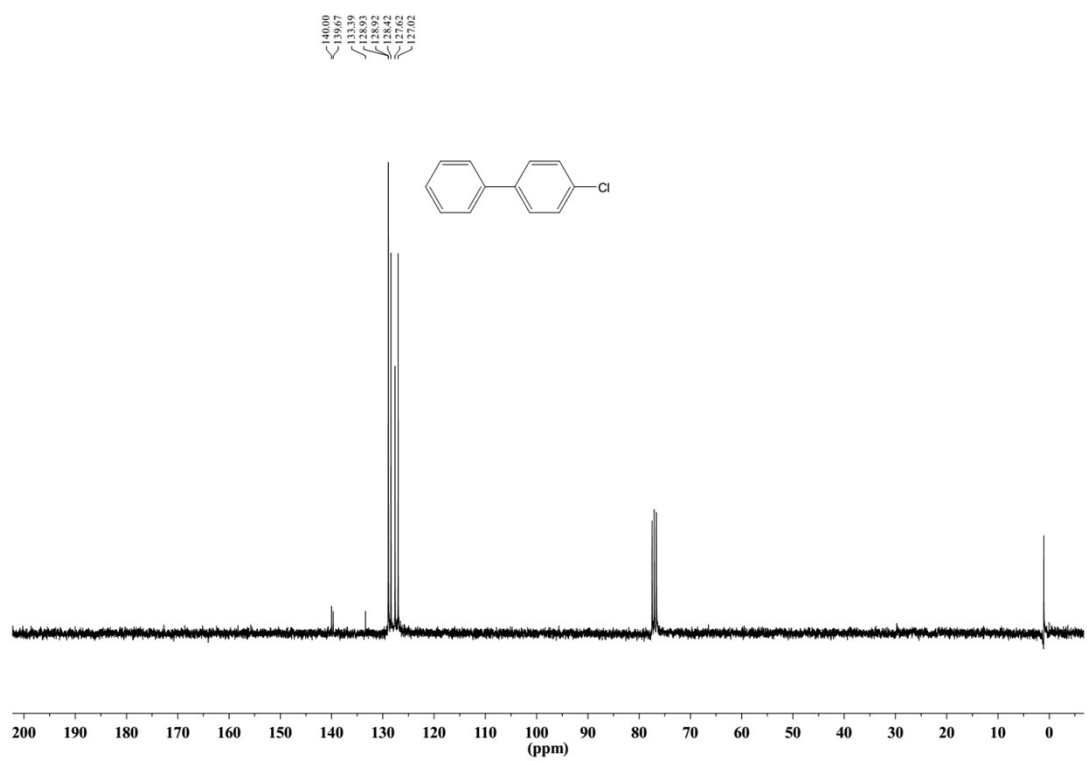

# 4-Methylbiphenyl (1d)

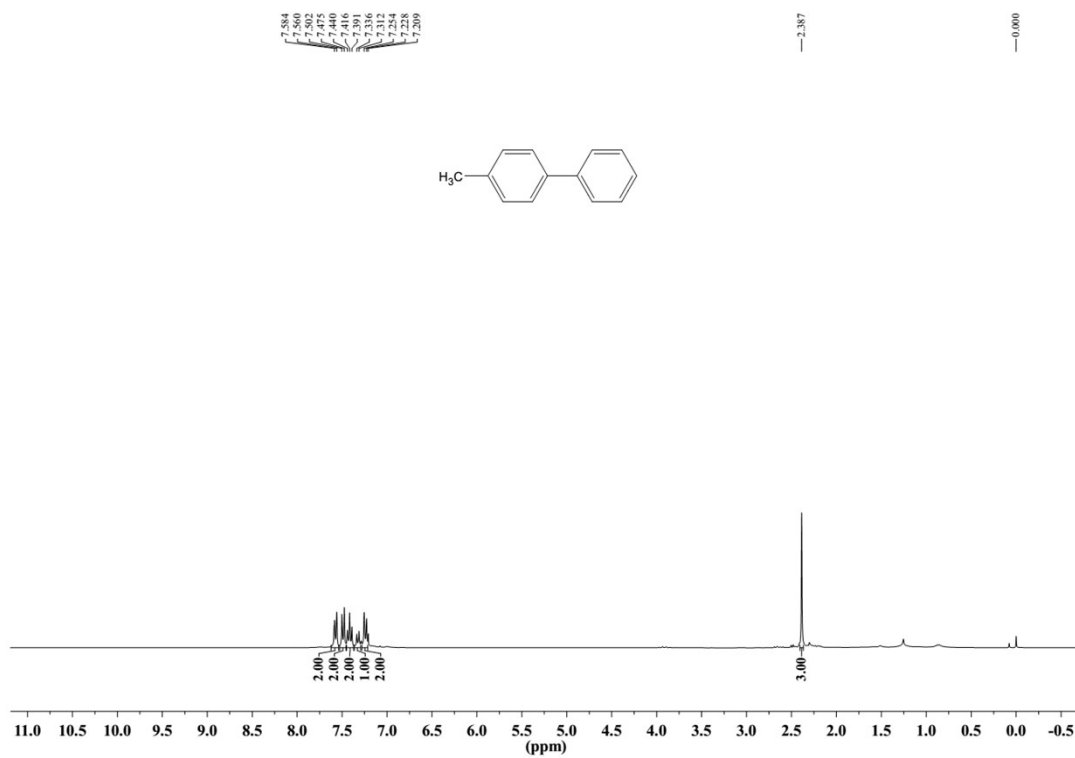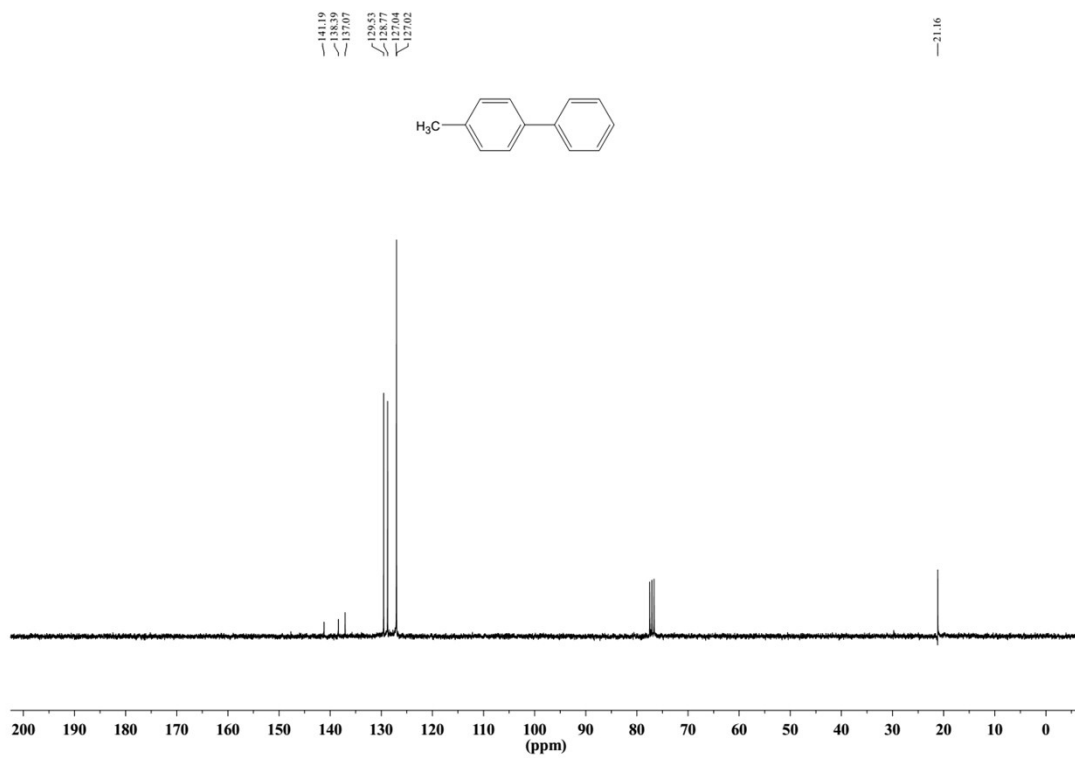

# 4-Methoxy-4'-methylbiphenyl (1e)

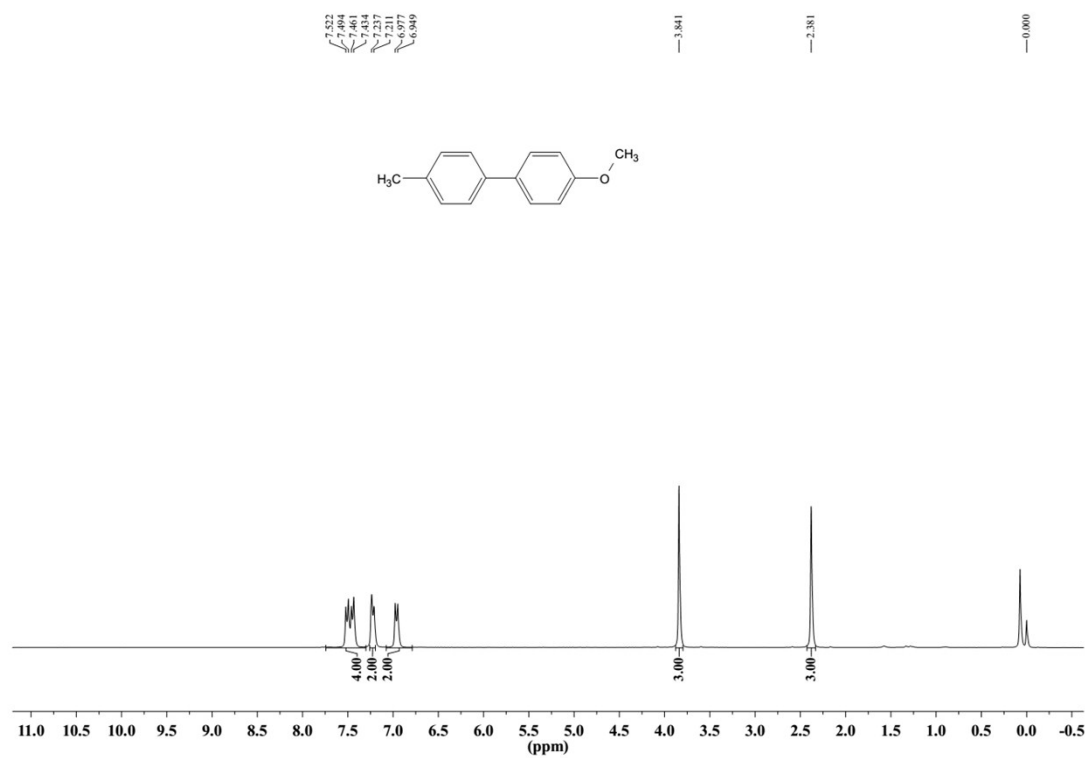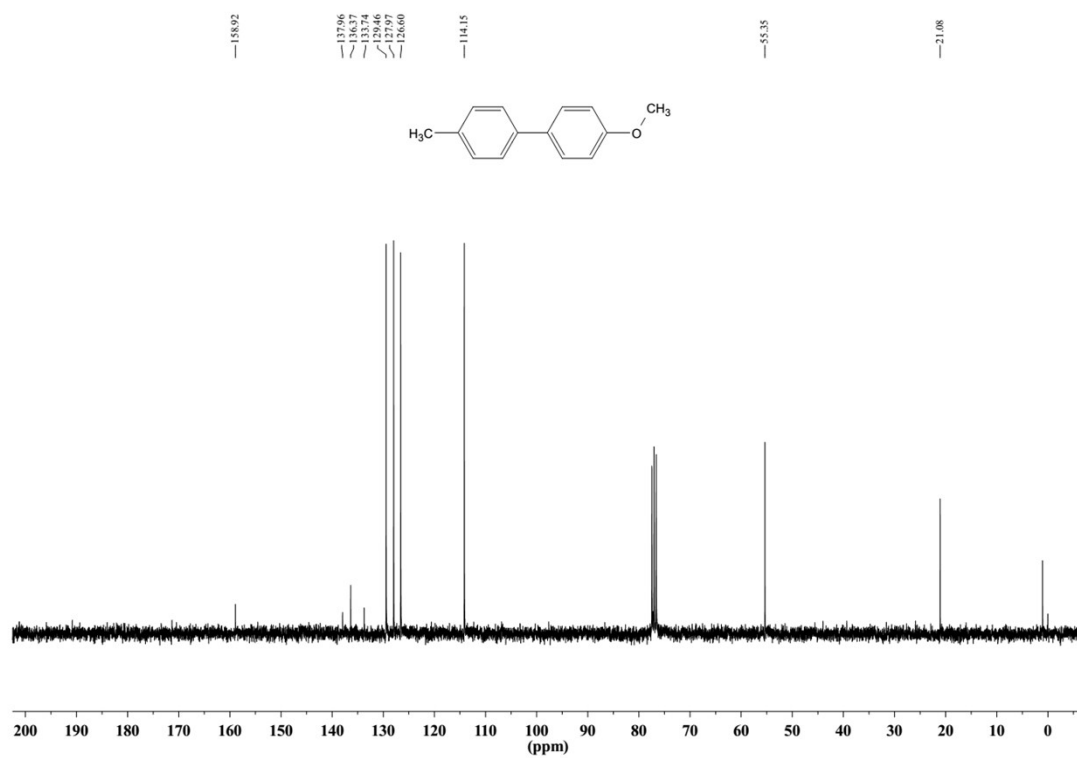



# 4-Chloro-4'-methoxybiphenyl (1f)

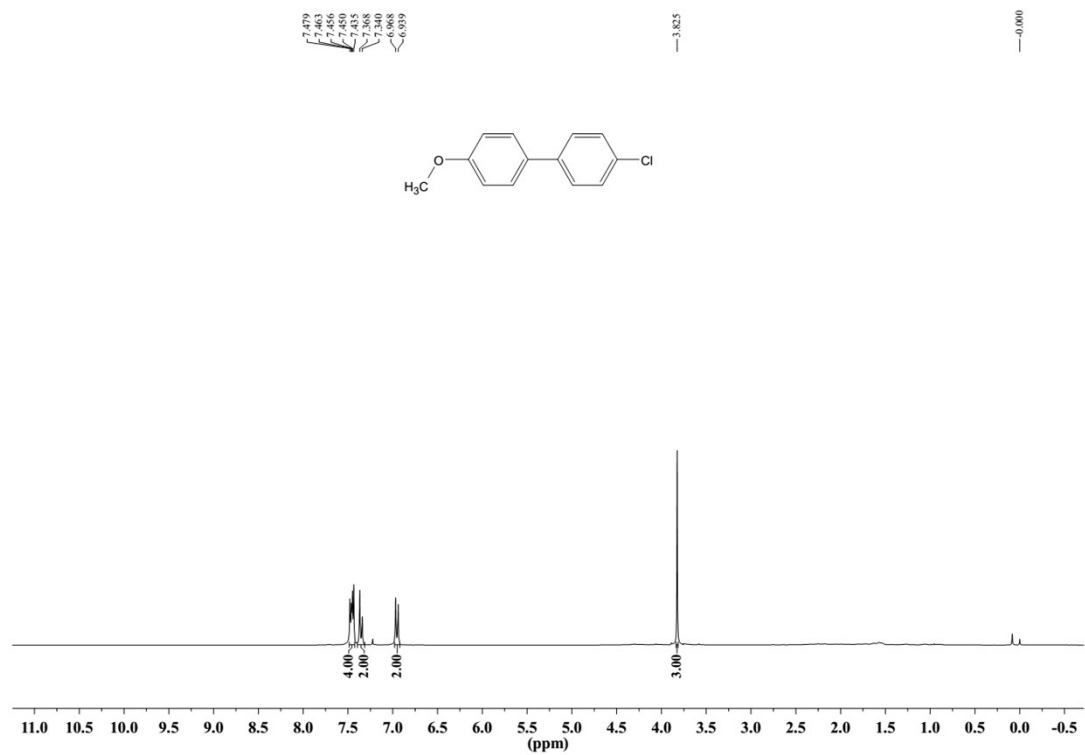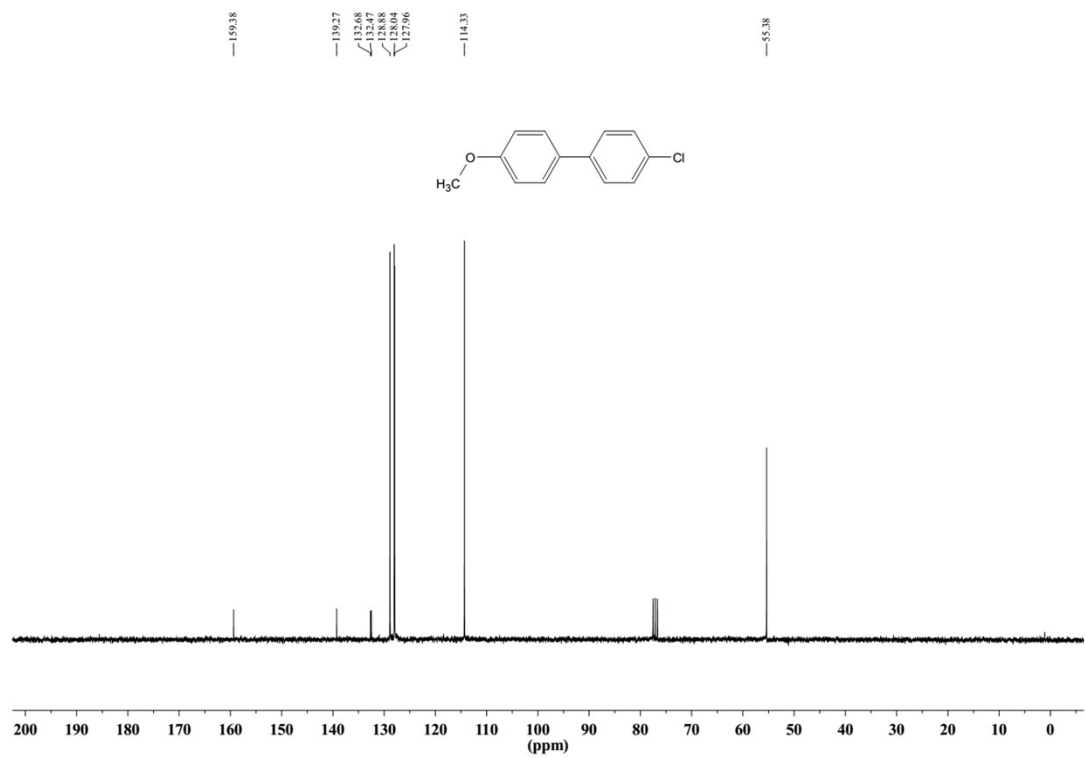

# 4'-Methoxybiphenyl-4-carbonitrile (1g)

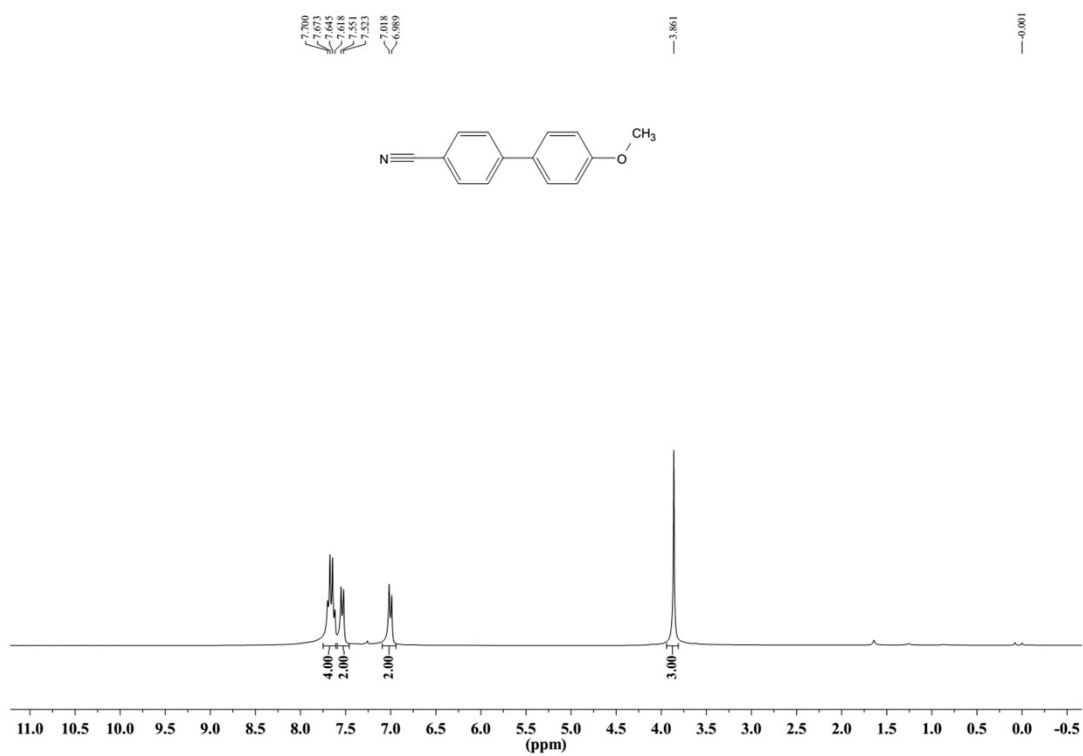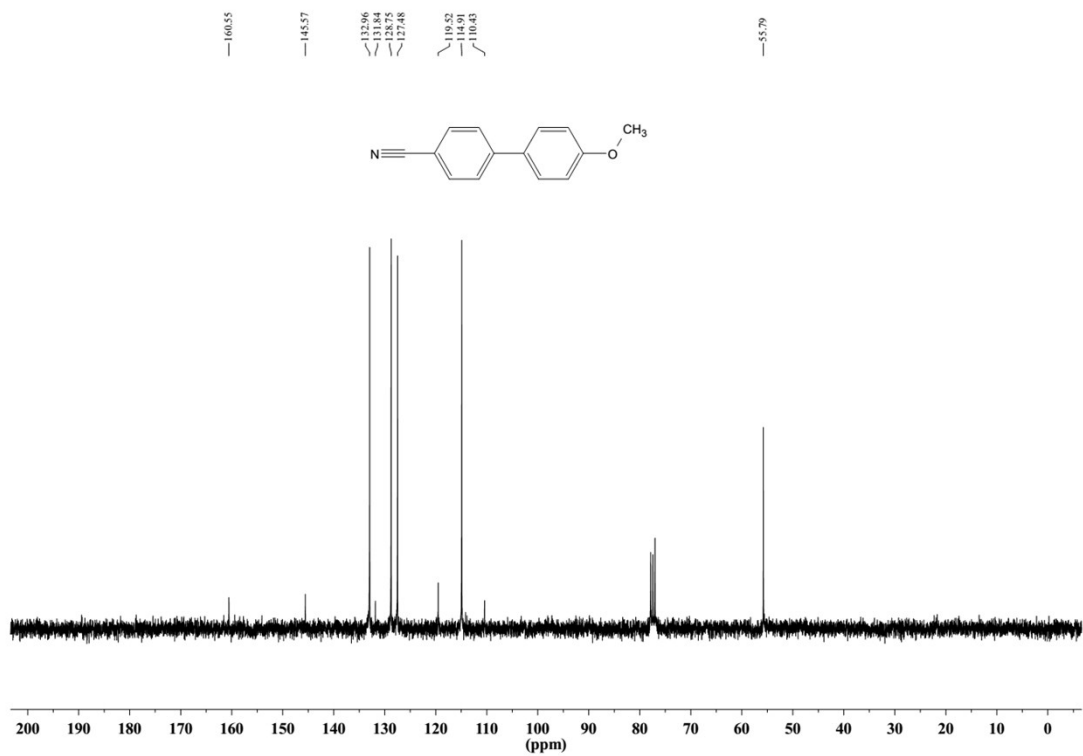

# 4'-Chlorobiphenyl-4-carbonitrile (1h)

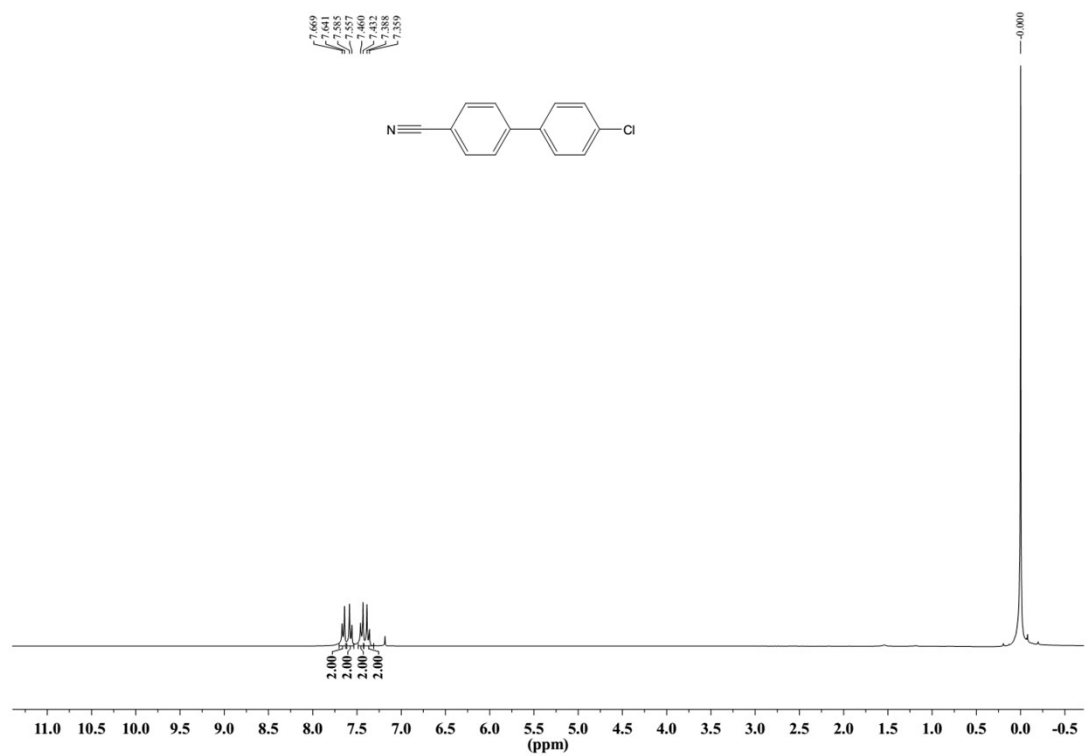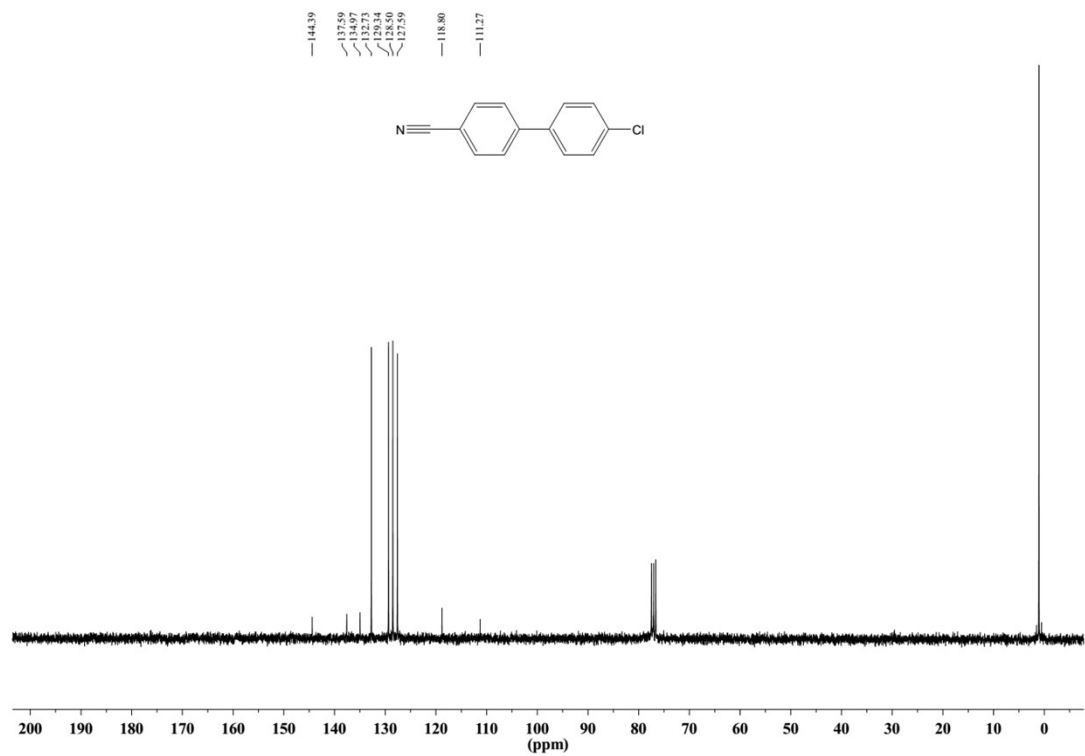

# Ethyl biphenyl-4-carboxylate (1i)

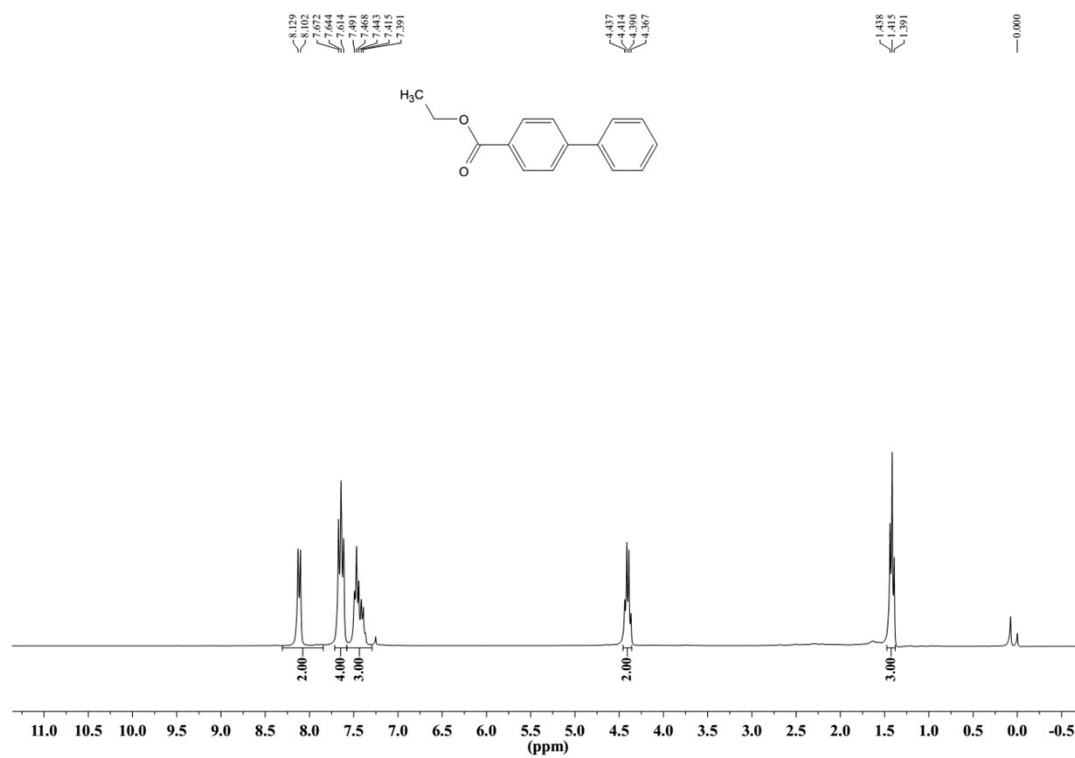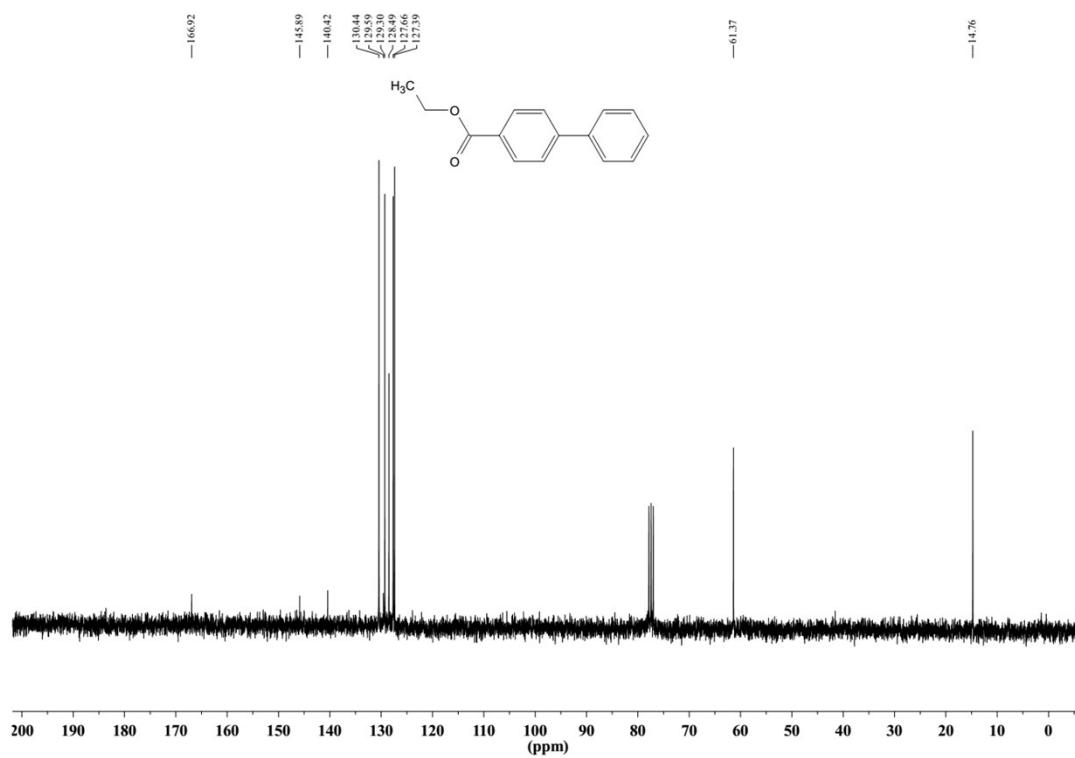

# 1-([1, 1'-biphenyl]-4-yl)ethanone (1j)

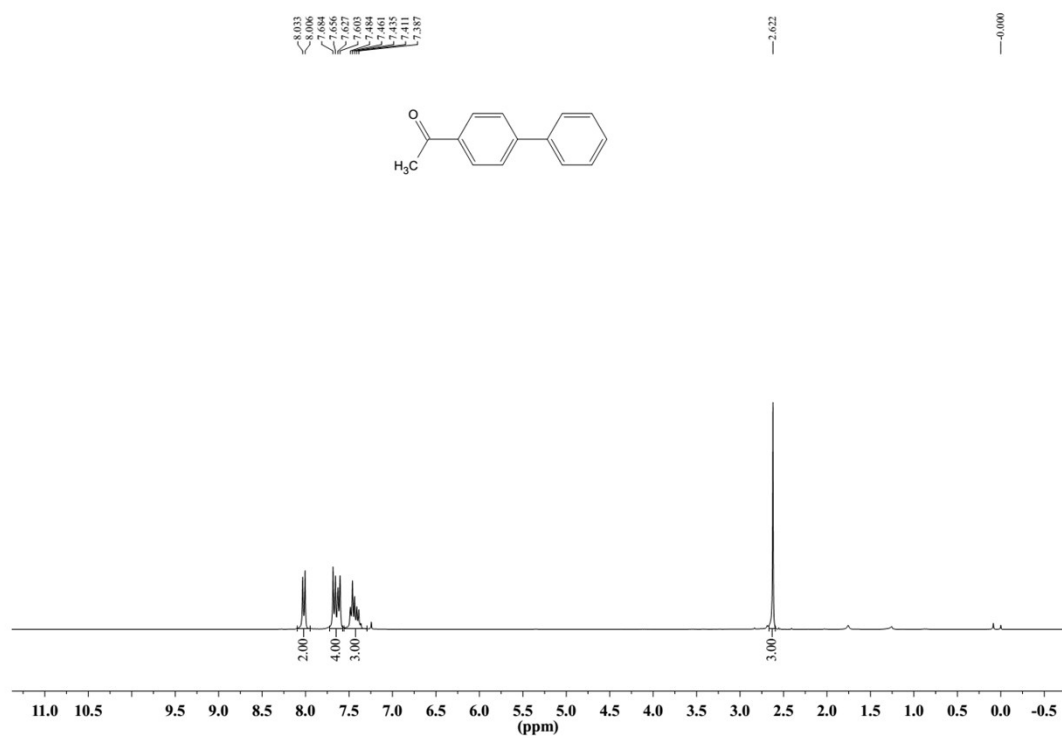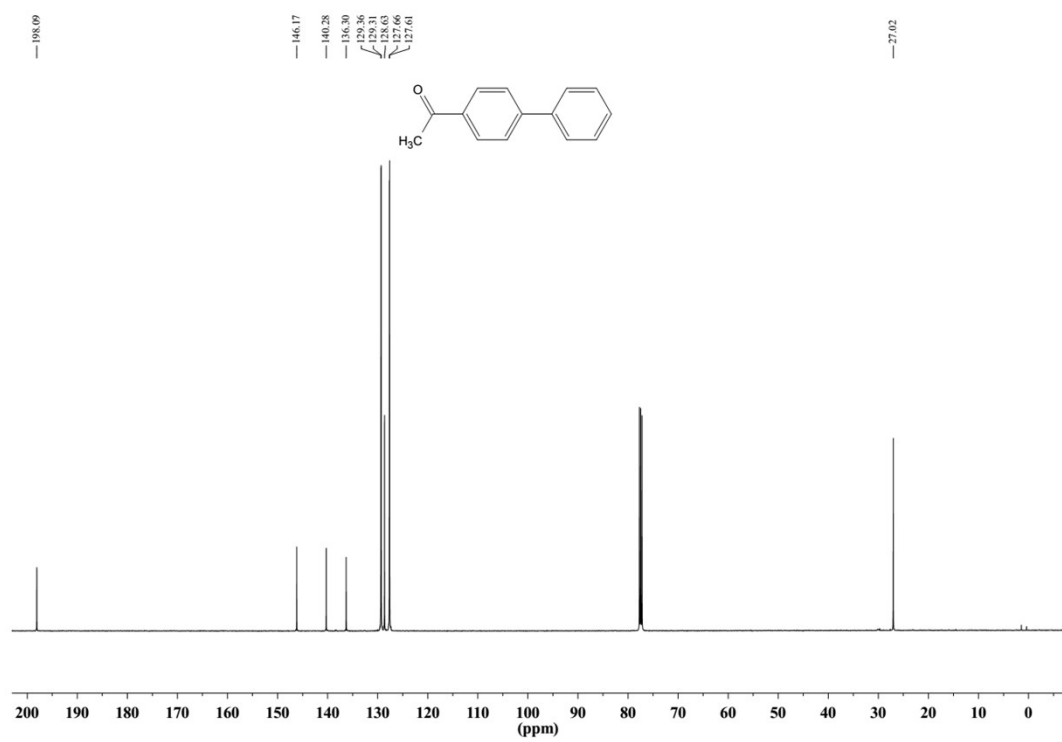

# 4'-Methoxybiphenyl-4-carbaldehyde (1k)

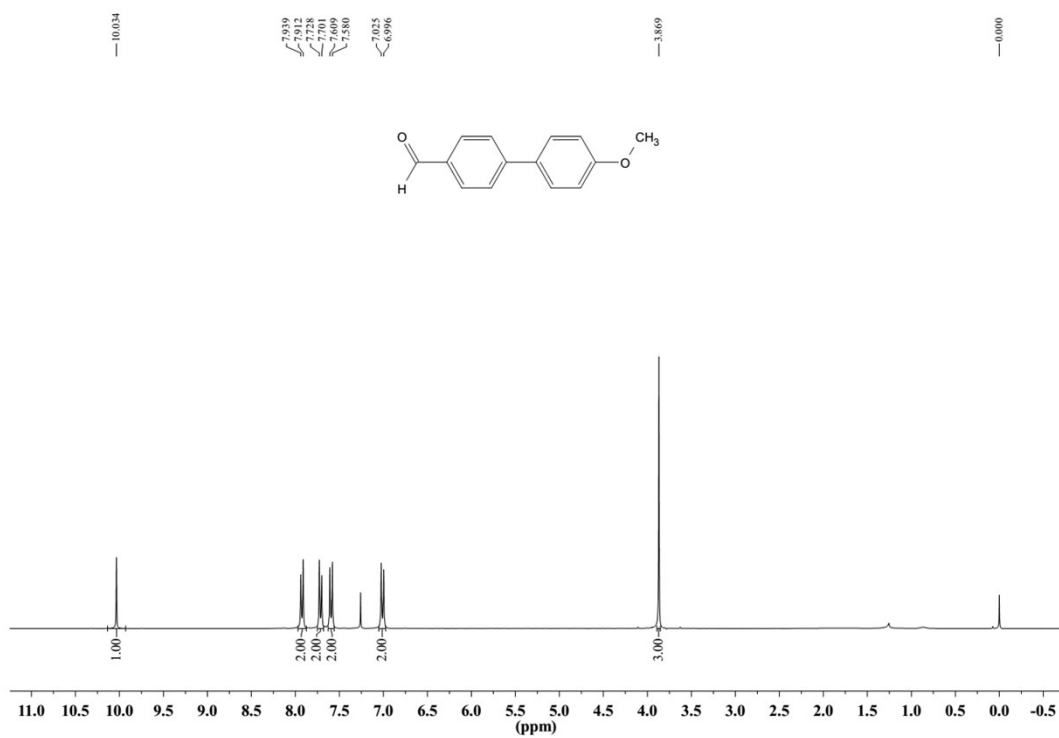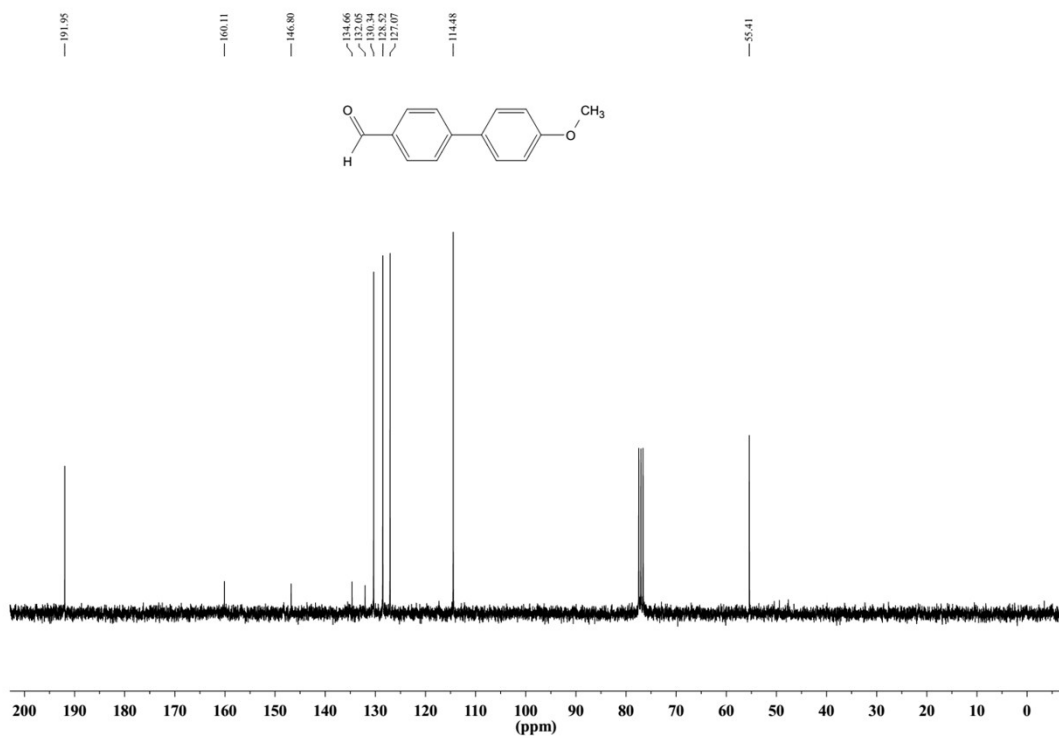

## 2-Methoxybiphenyl (11)

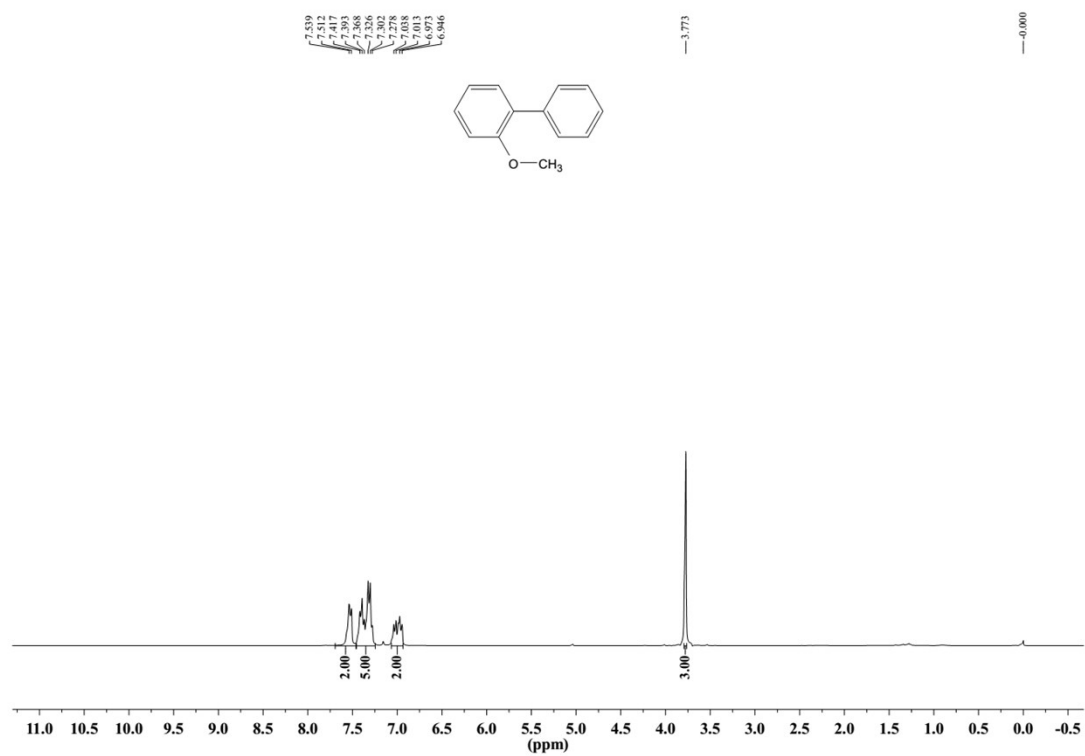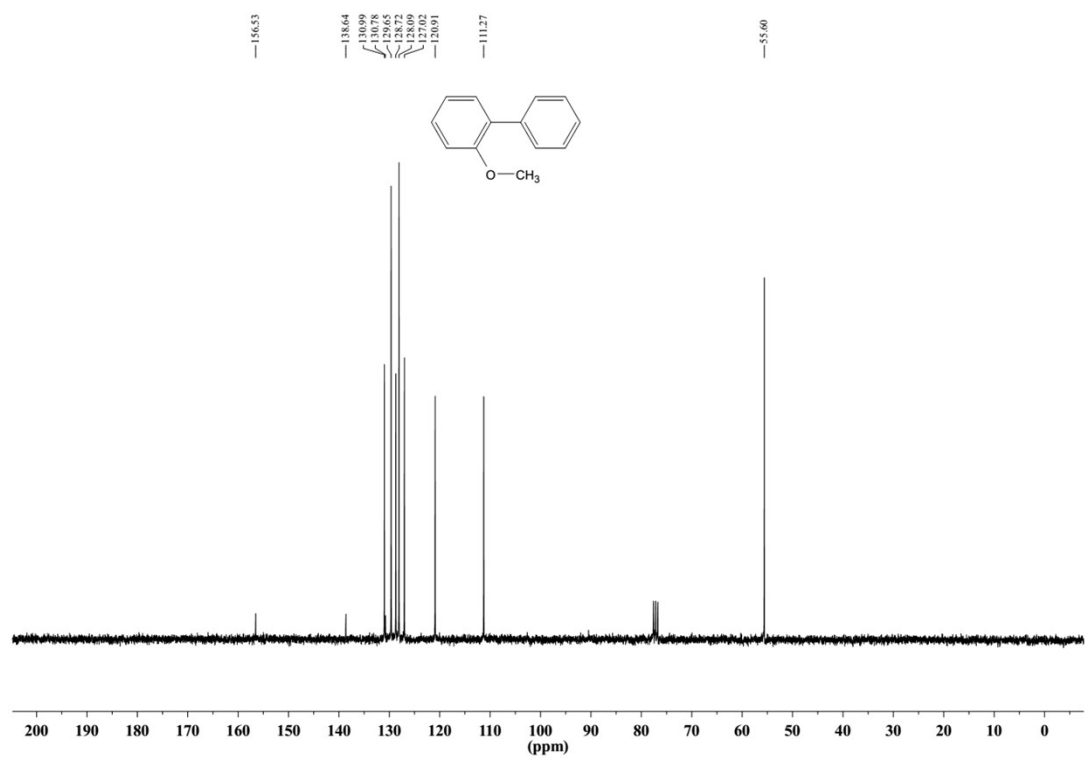

# 4'-Chloro-2-methoxybiphenyl (1m)

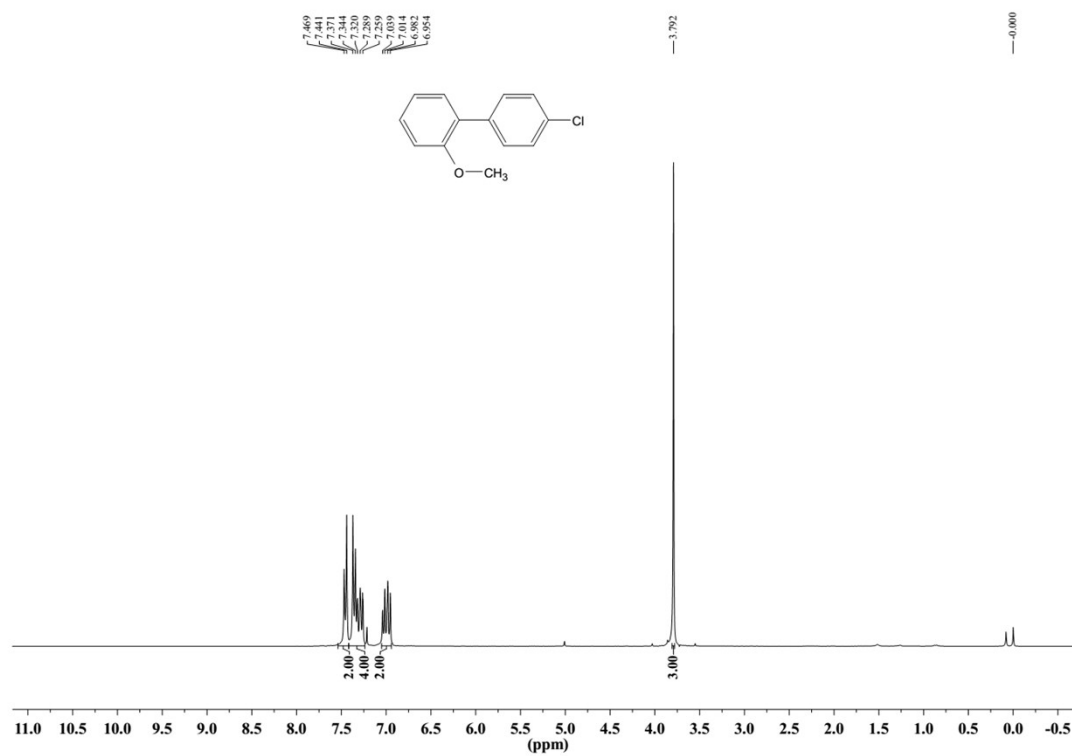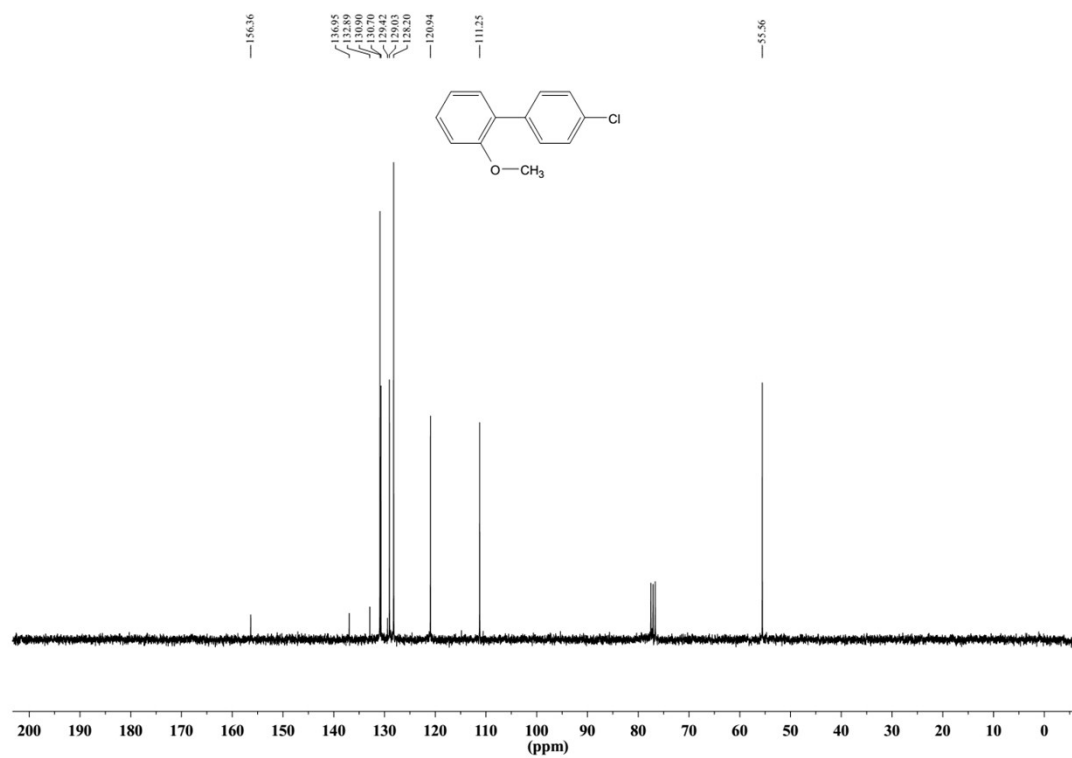



# 4, 4''-dimethoxy-1,1':2',1''-terphenyl (1n)

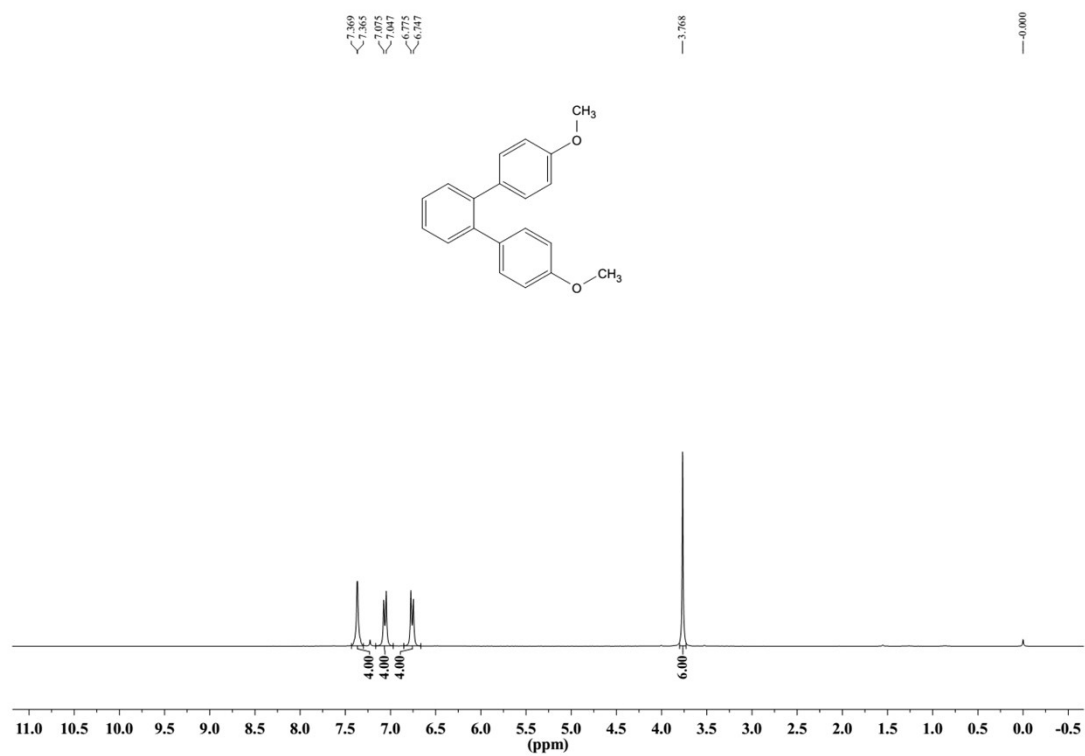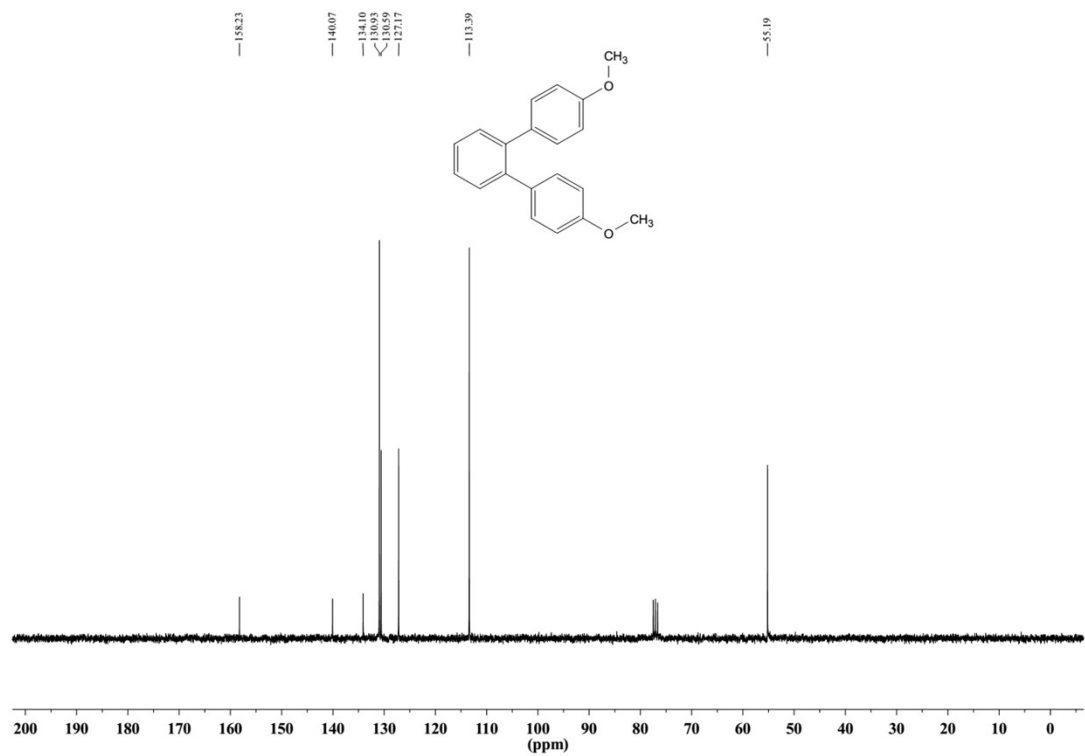

# 4-(4-Trifluoromethylphenyl)anisole (1o)

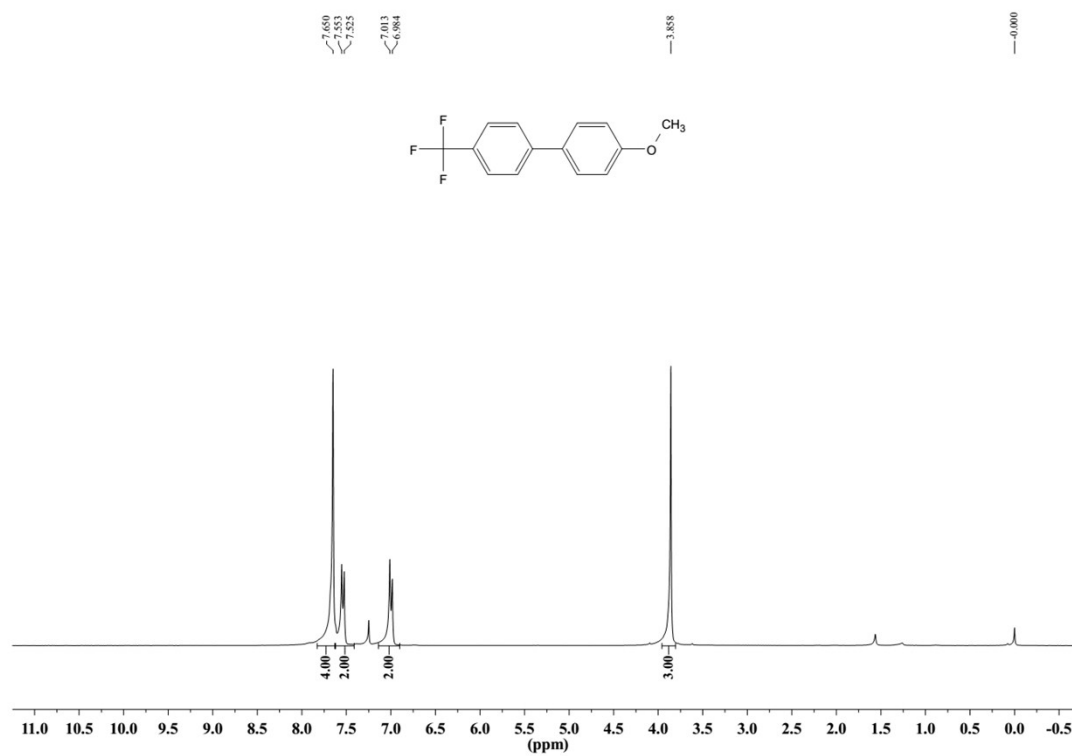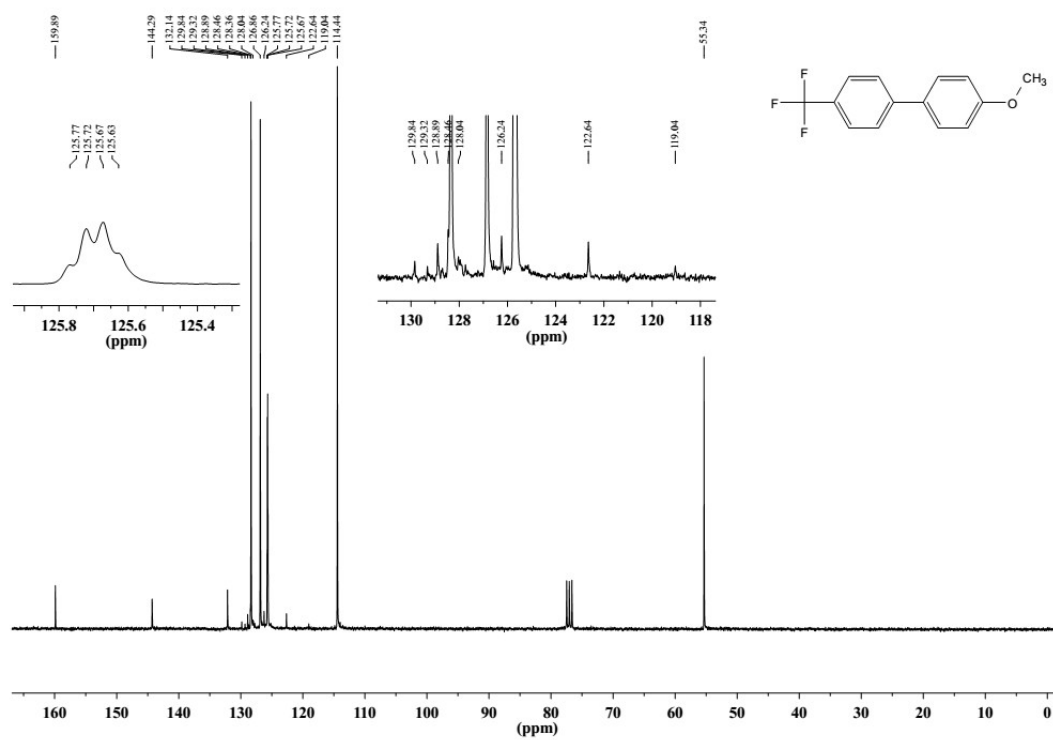

### 3-(4-Methoxyphenyl) pyridine (1p)

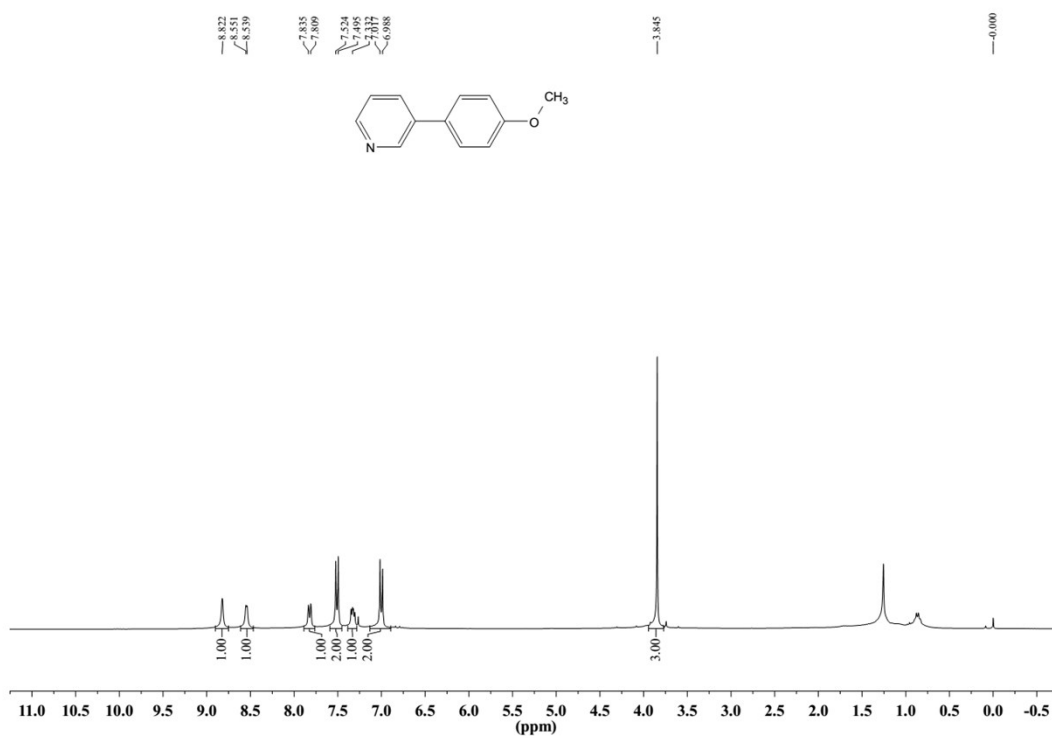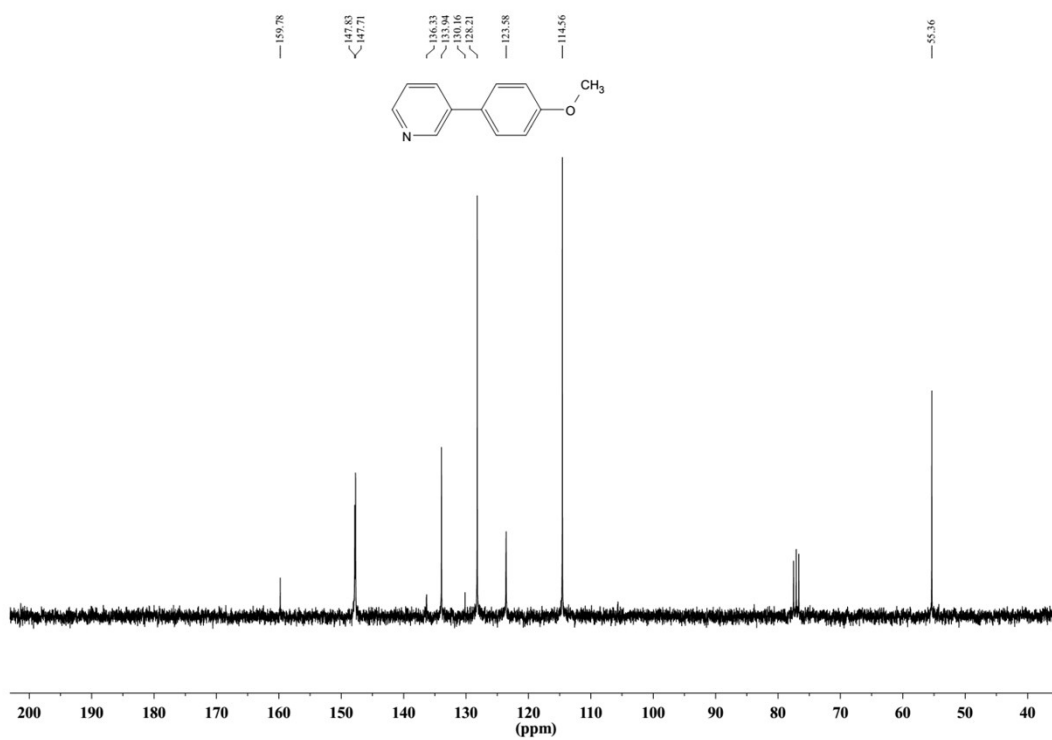

# Benzophenone (2a)

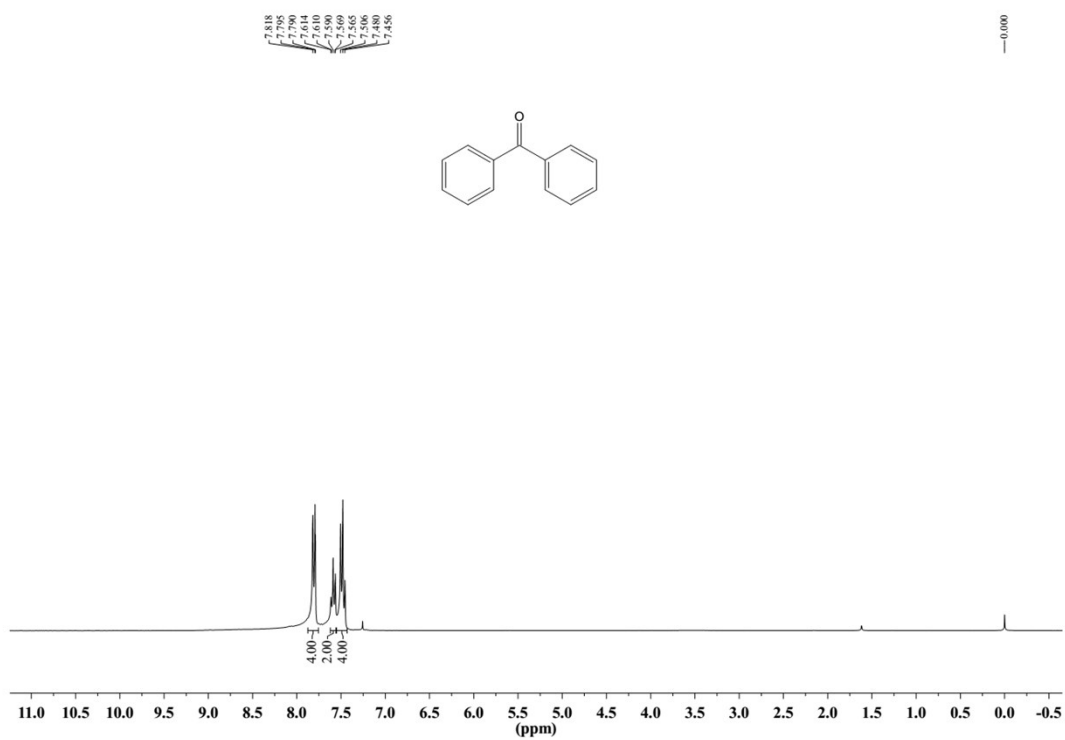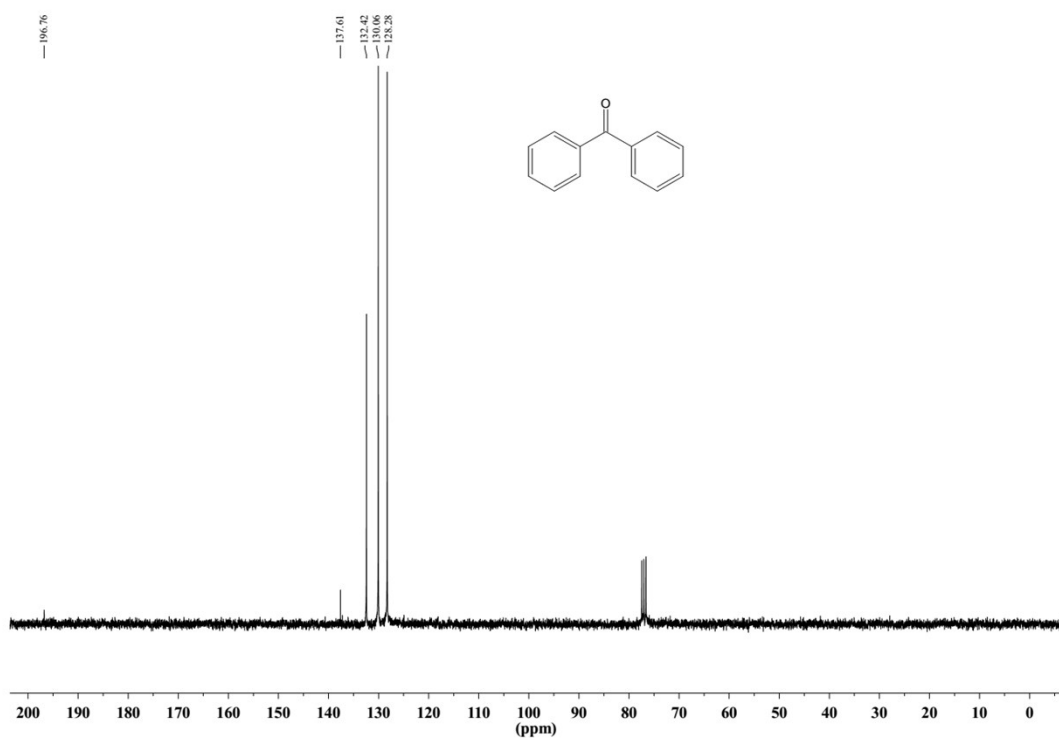

# (4-Methoxyphenyl)(phenyl)methanone (2b)

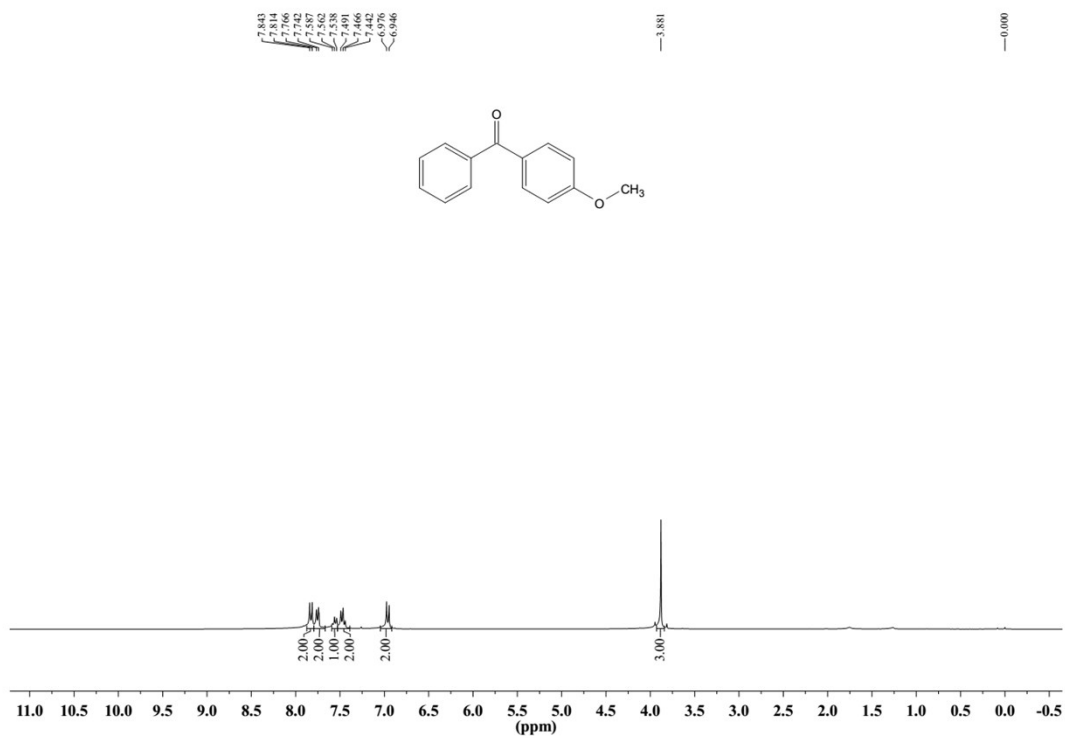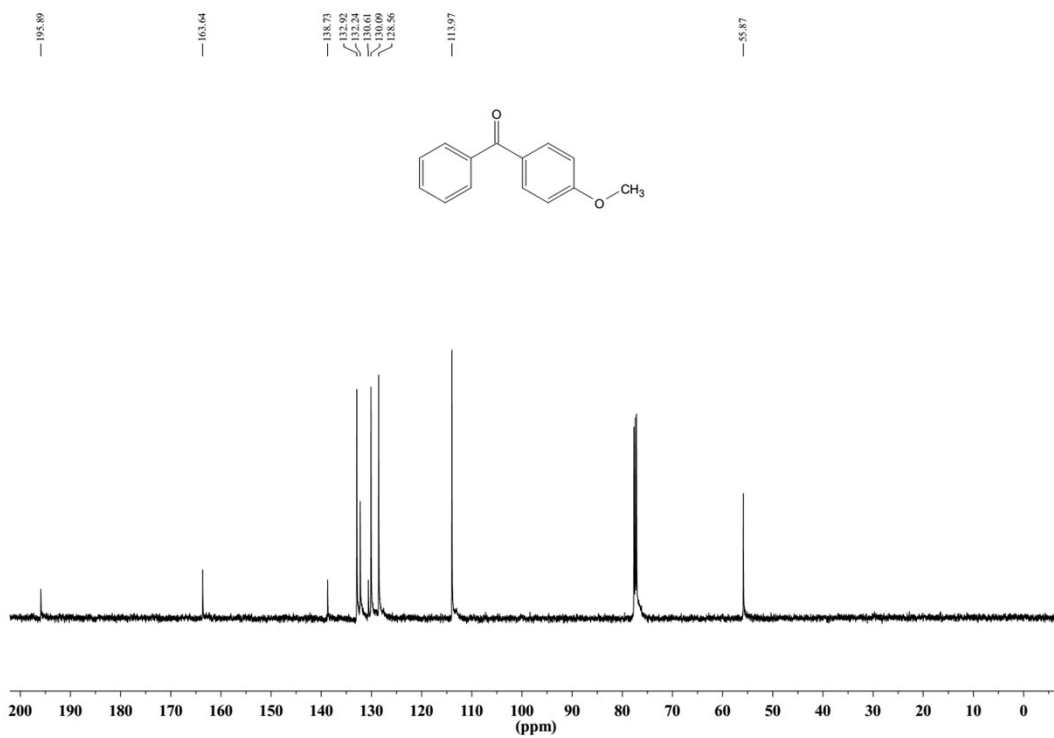

# (4-Chlorophenyl)(phenyl)methanone (2c)

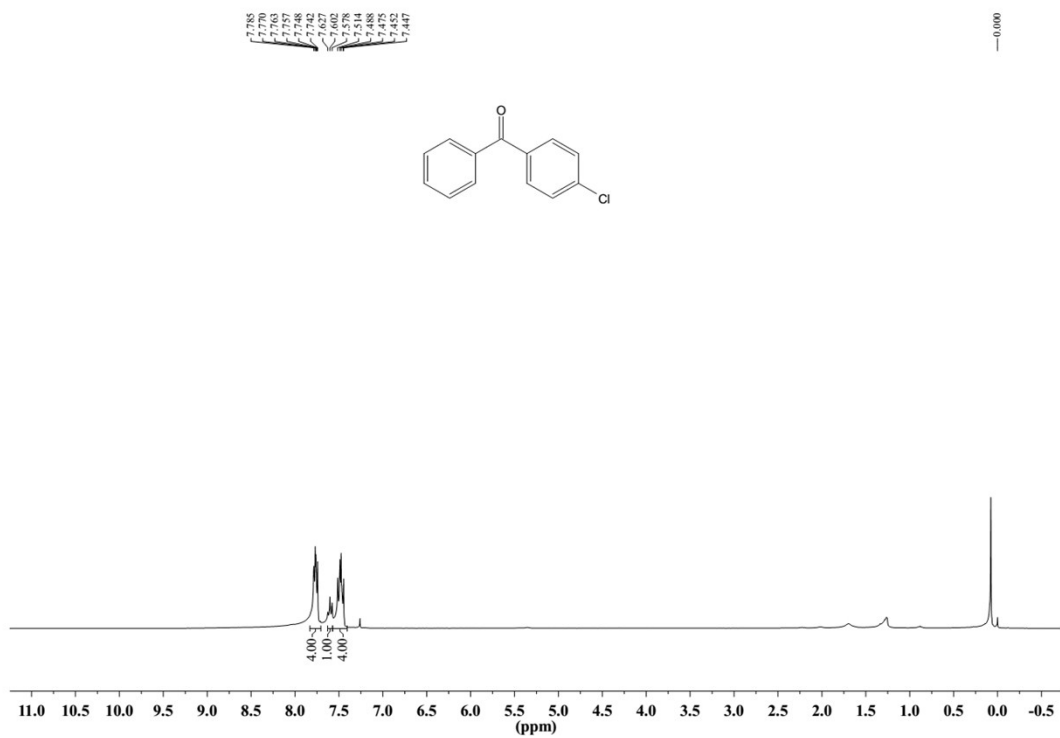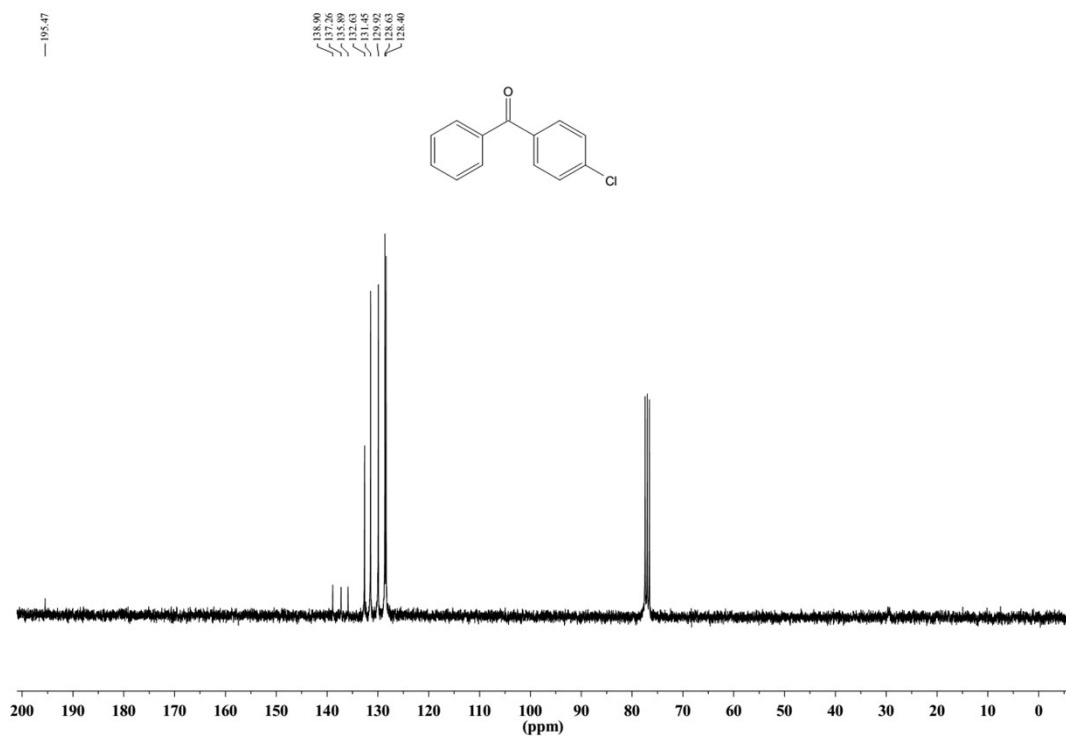

# Phenyl(p-tolyl)methanone (2d)

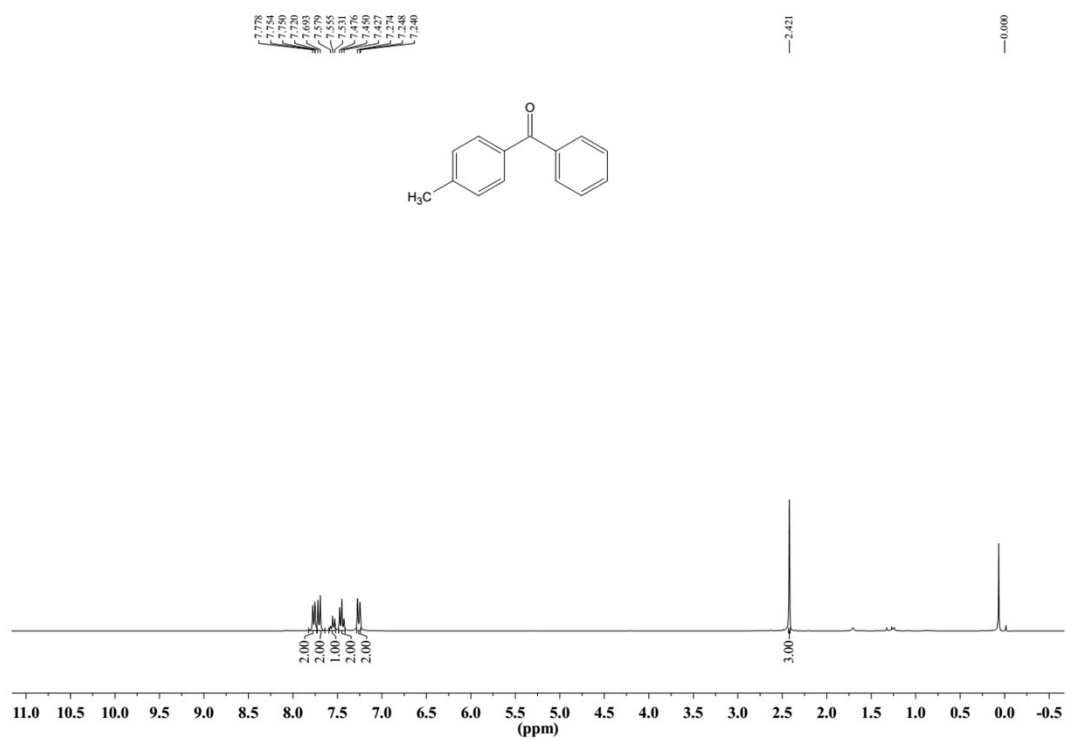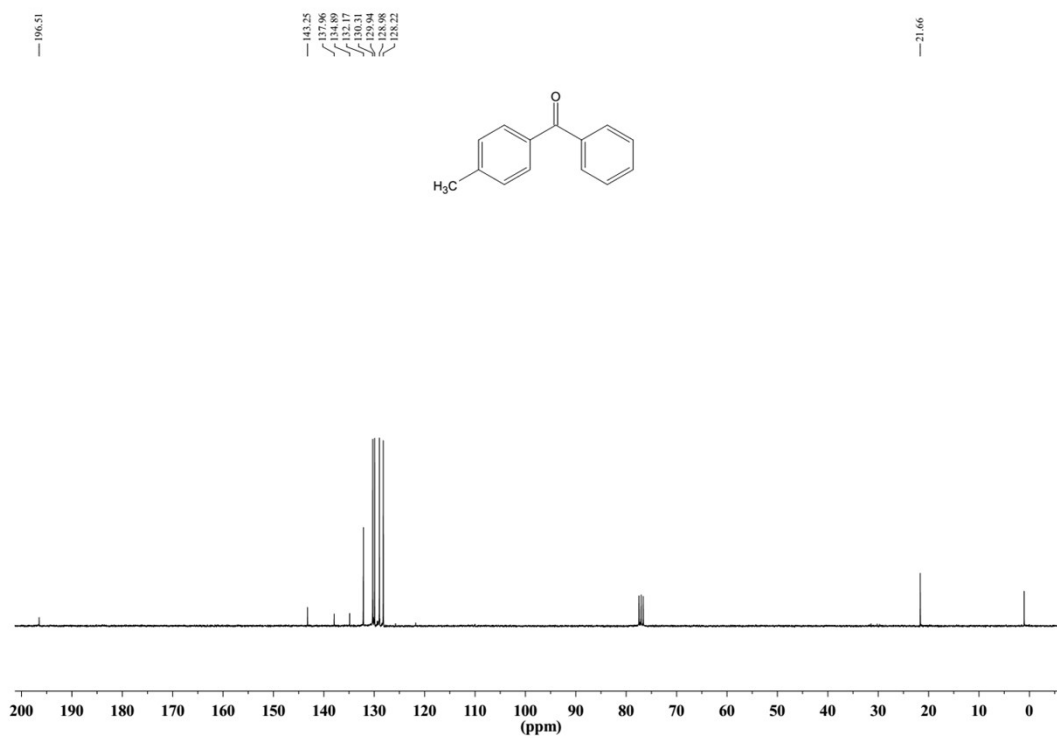

(4-Methoxyphenyl)(p-tolyl)methanone (2e)

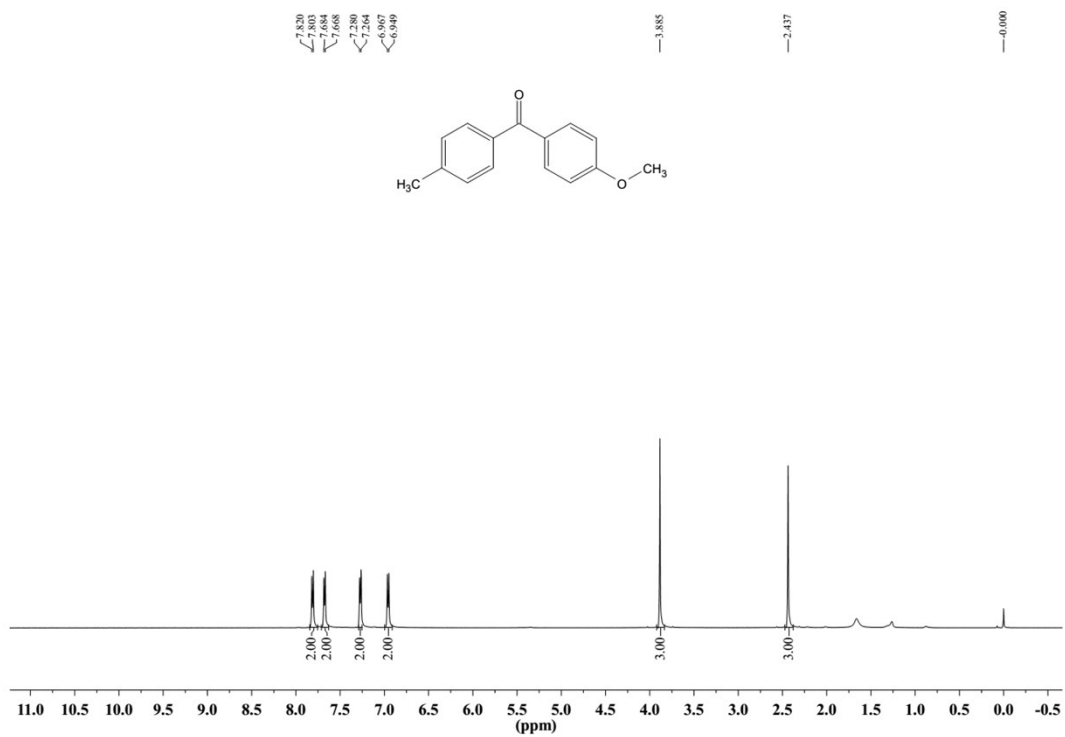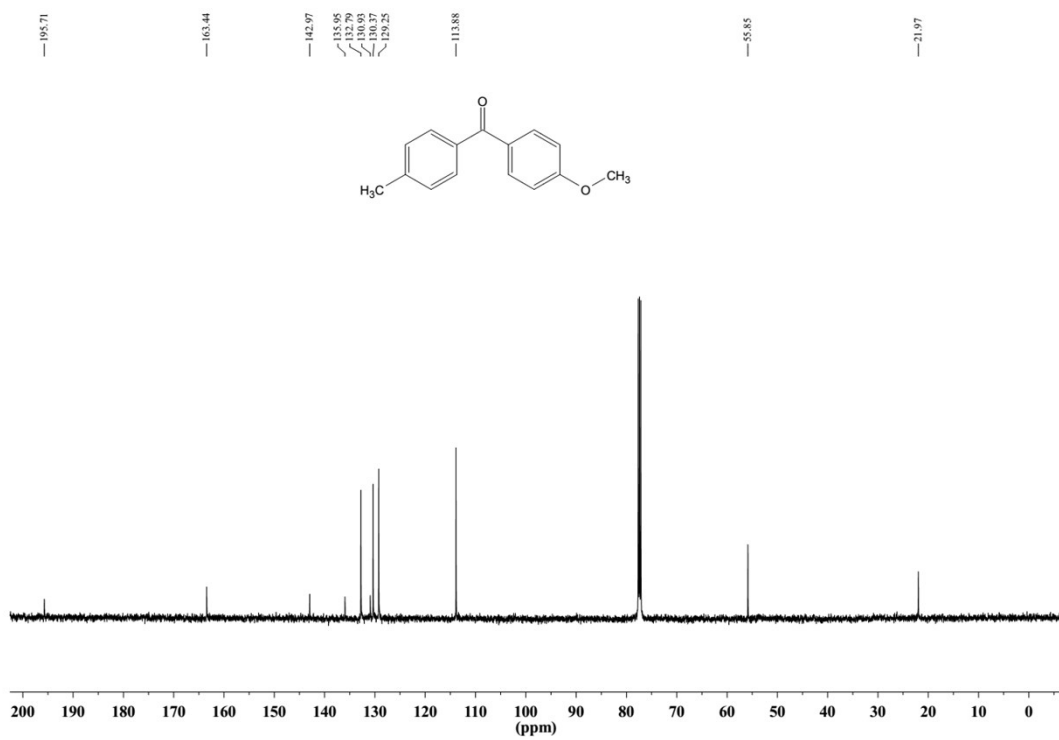



# 4-Benzoylbenzonitrile (2f)

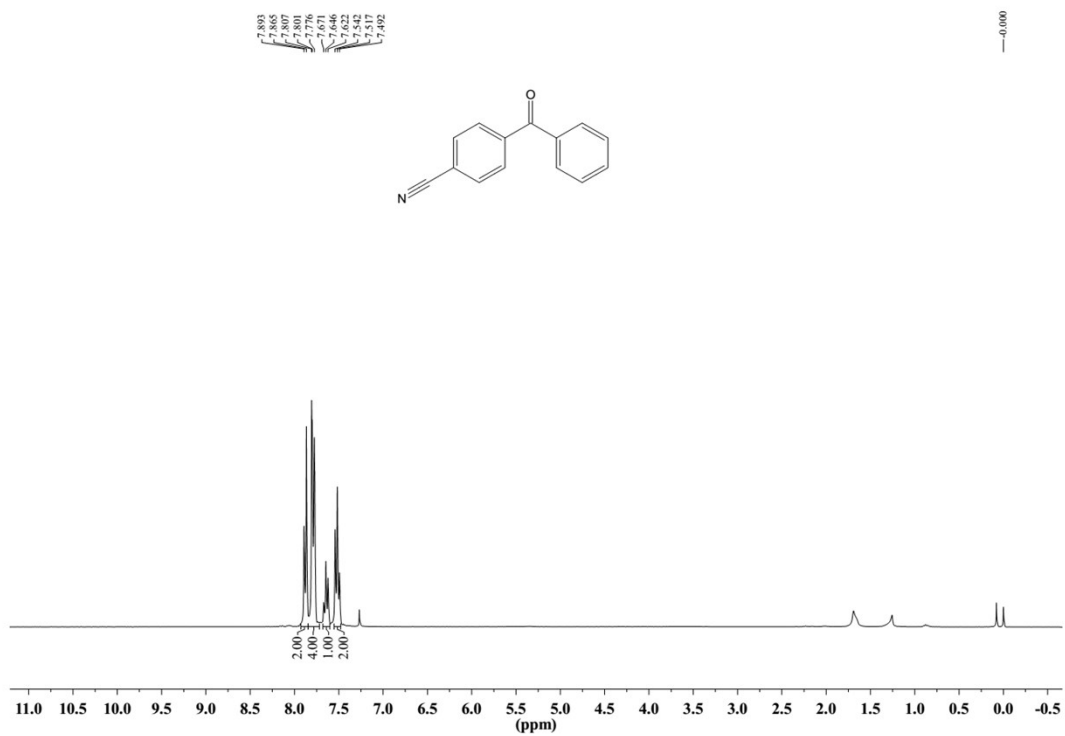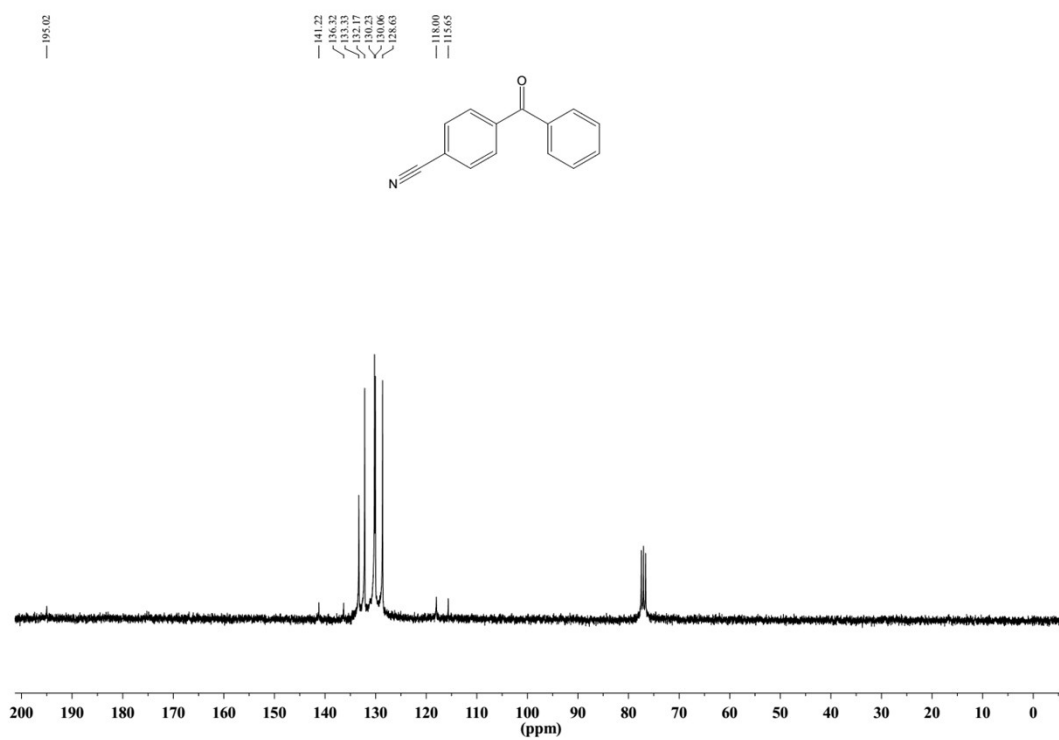

# 4-(4-Methoxybenzoyl)benzonitrile (2g)

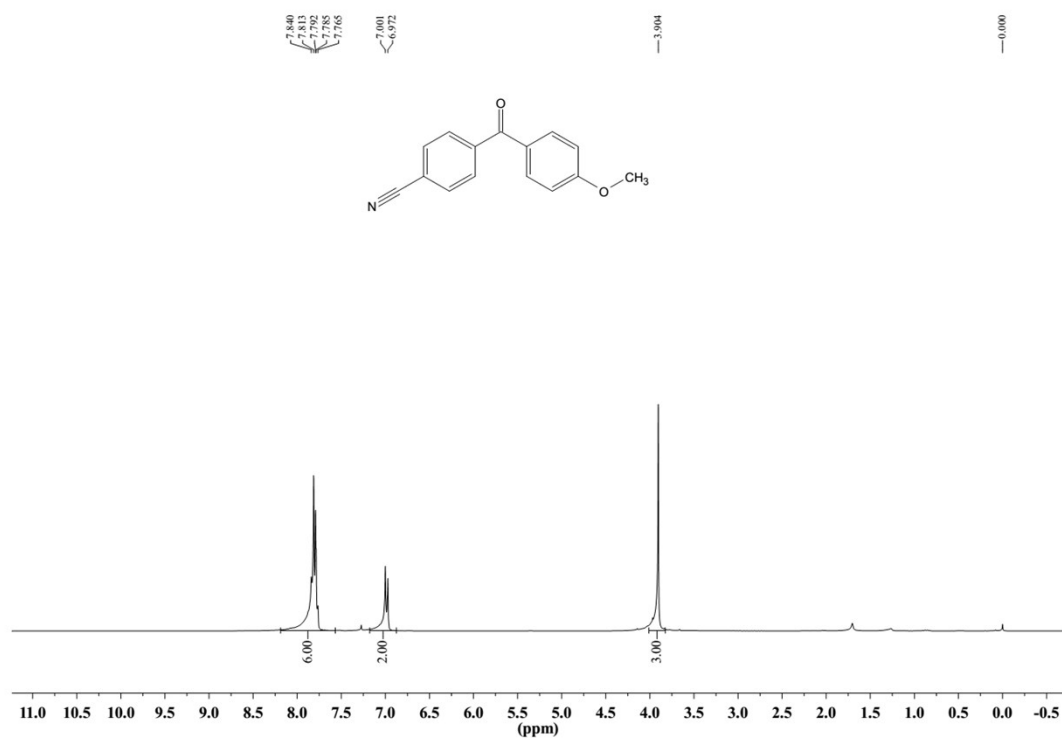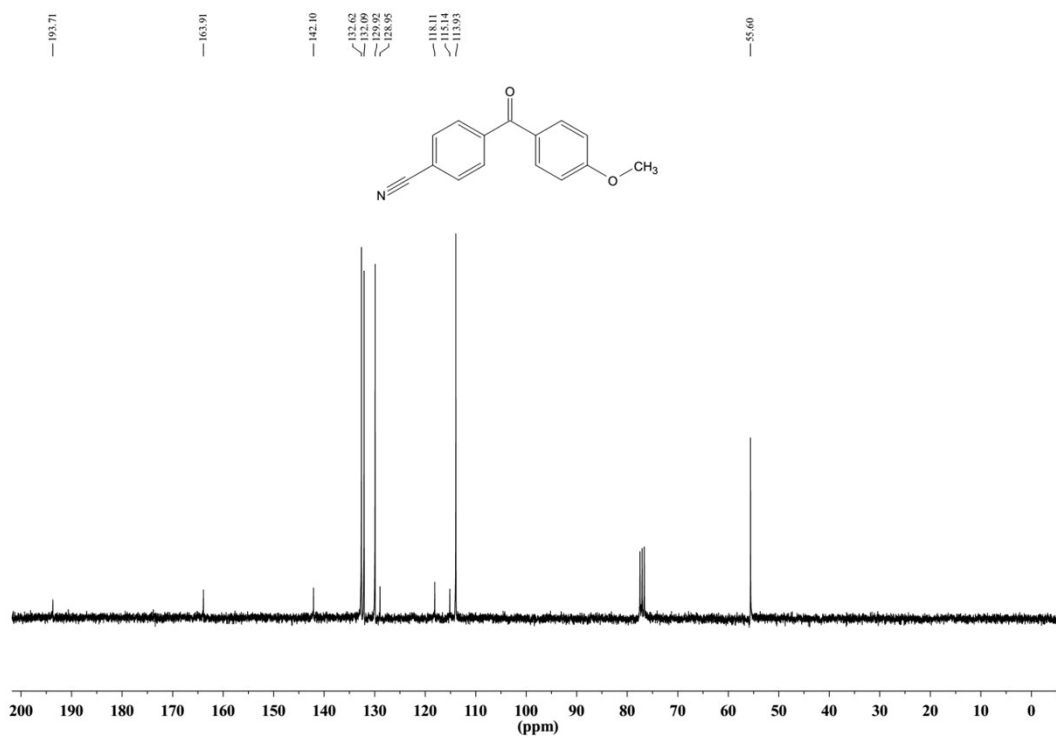

# Ethyl 4-benzoylbenzoate (2h)

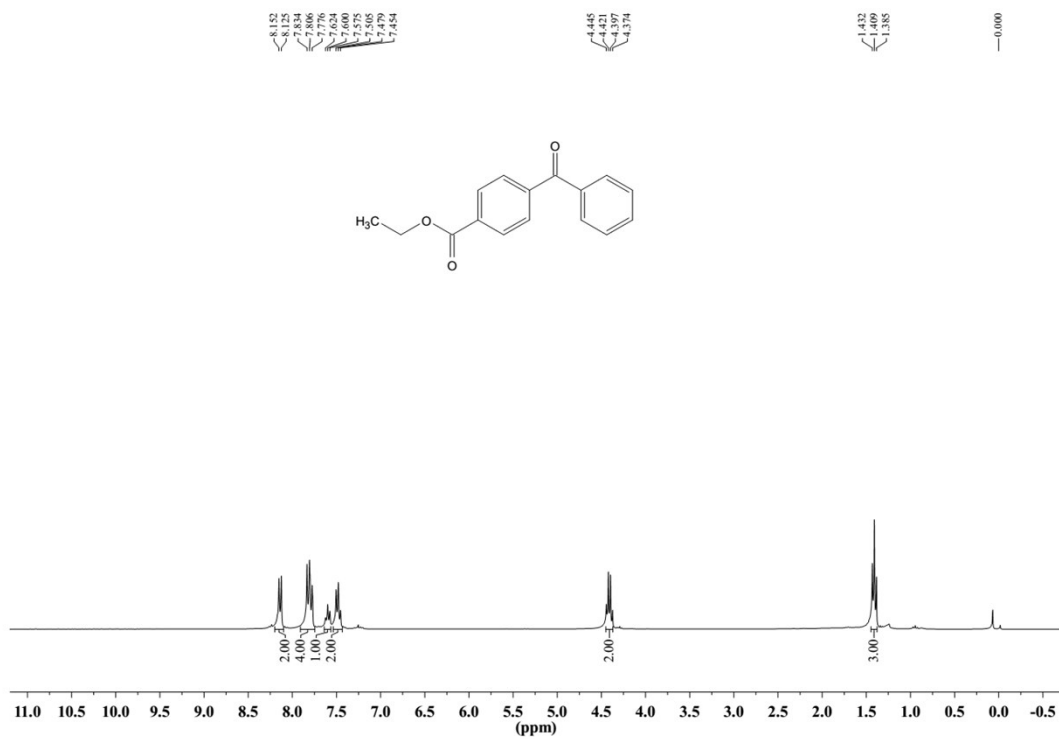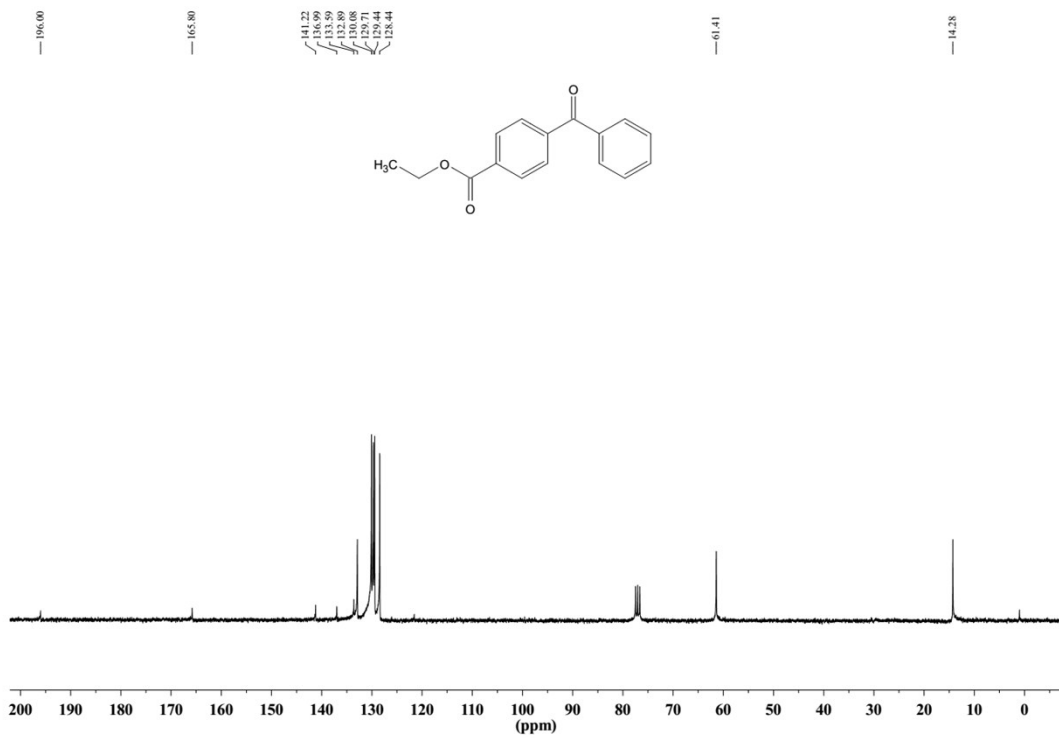

# 1-(4-Benzoylphenyl)ethanone (2i)

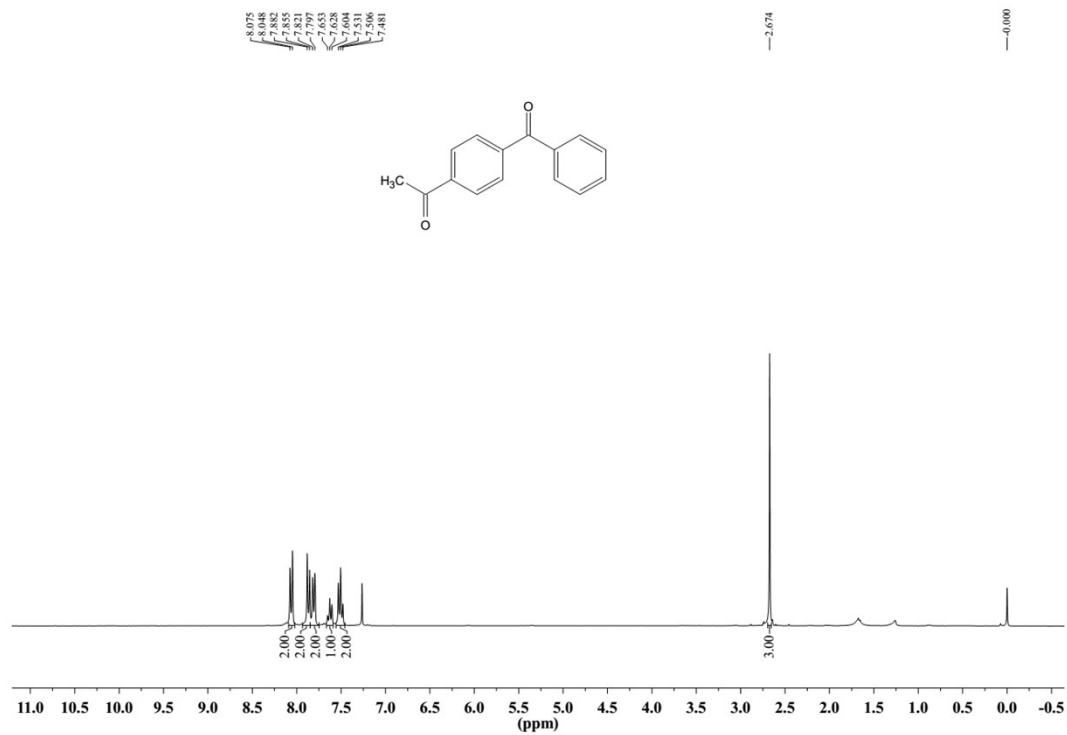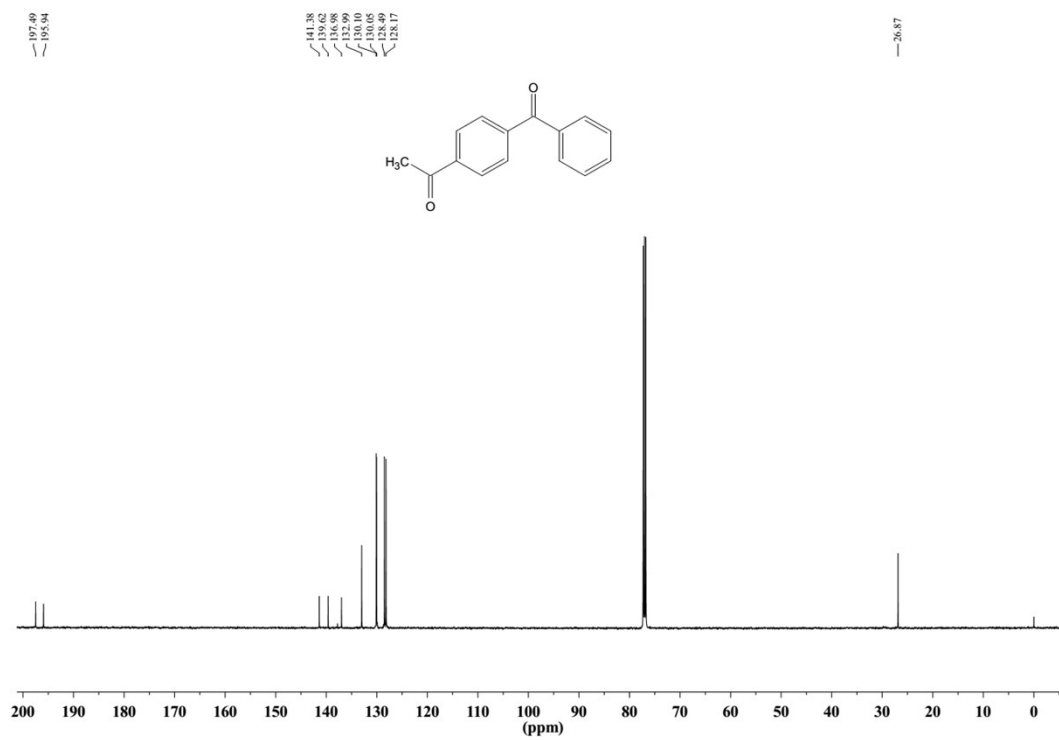

# 4-(4-Methoxybenzoyl)benzaldehyde (2j)

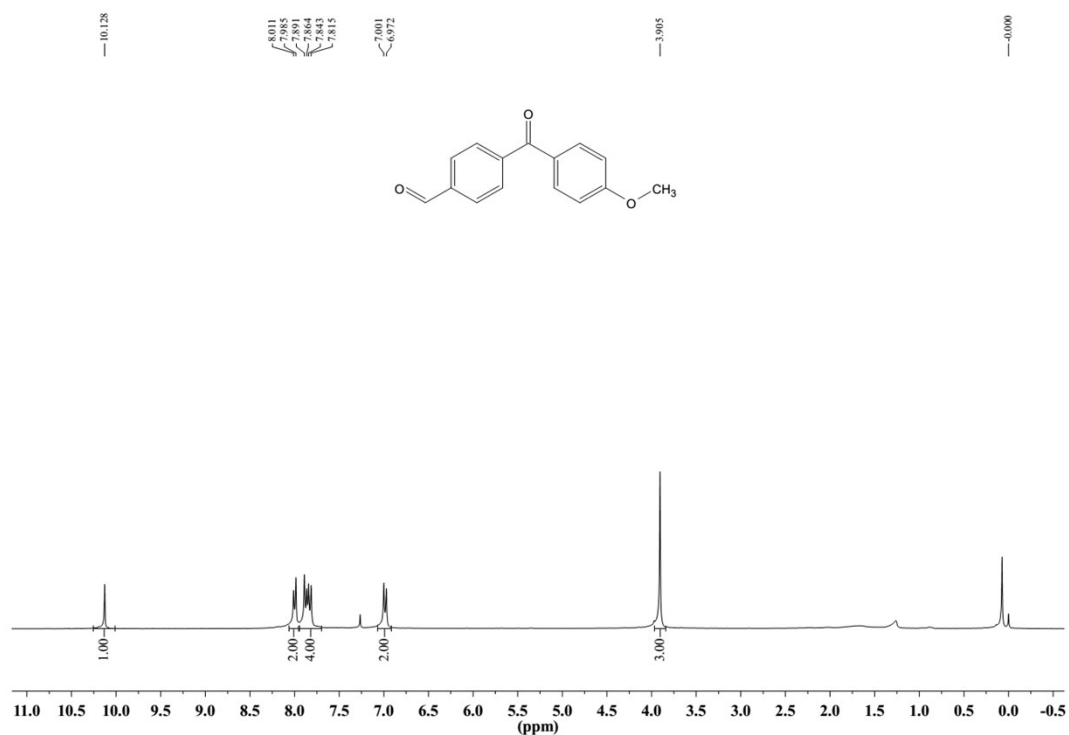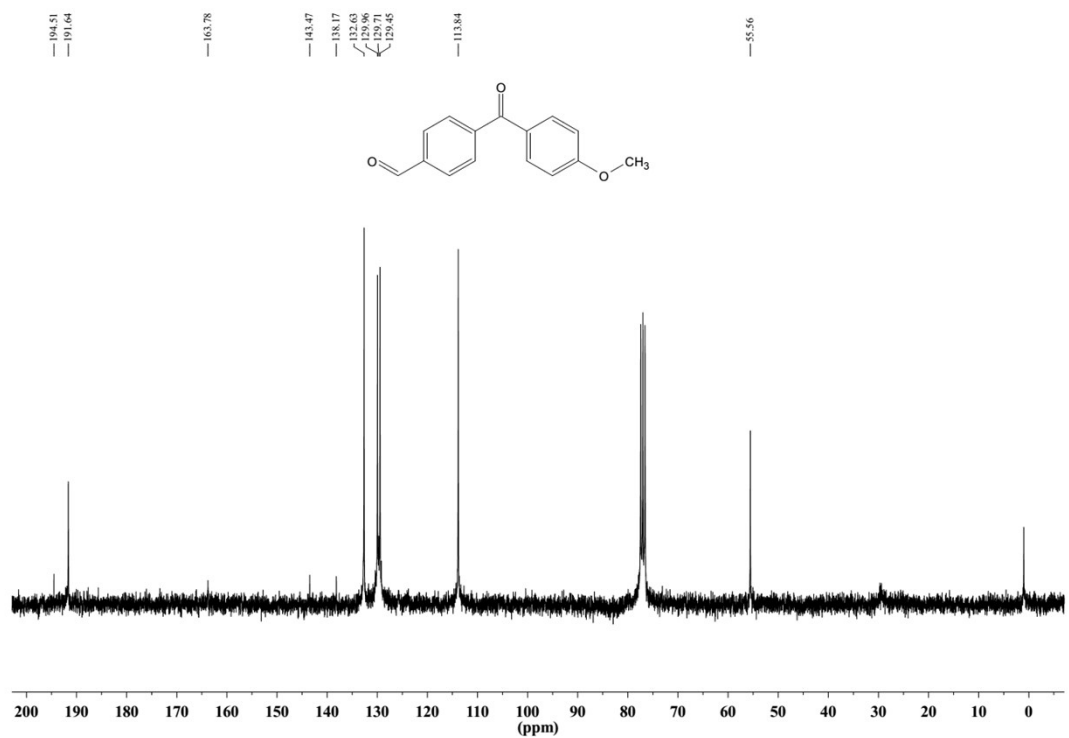

(4-Methoxyphenyl)(pyridin-3-yl)methanone (2k)

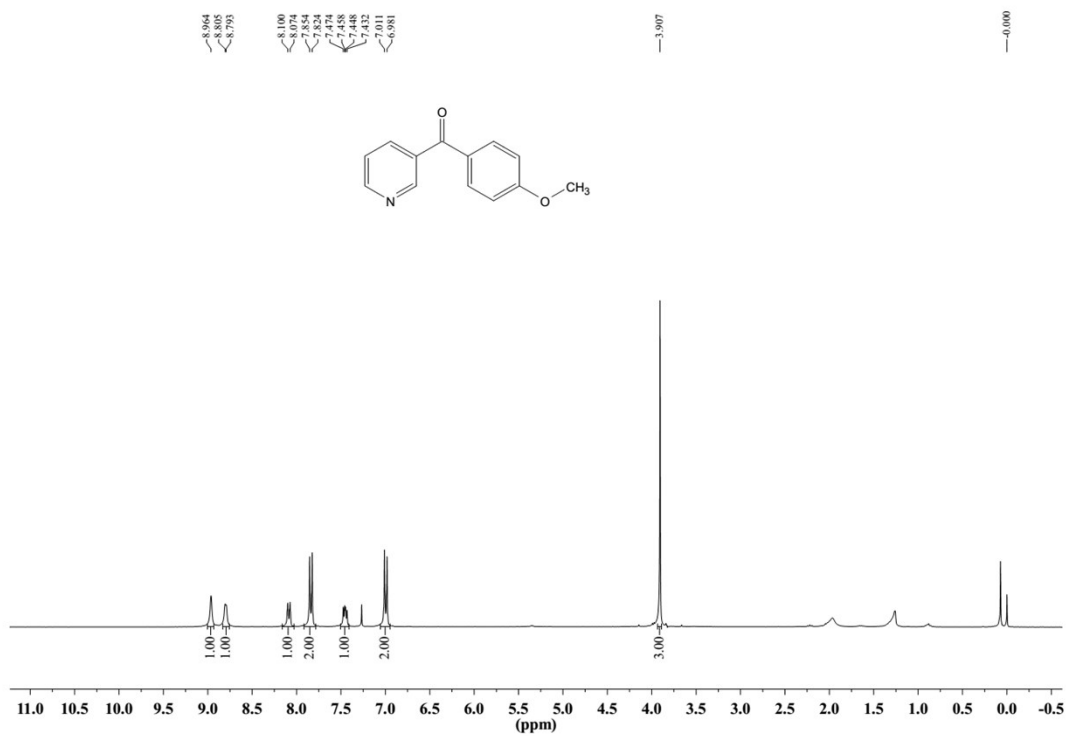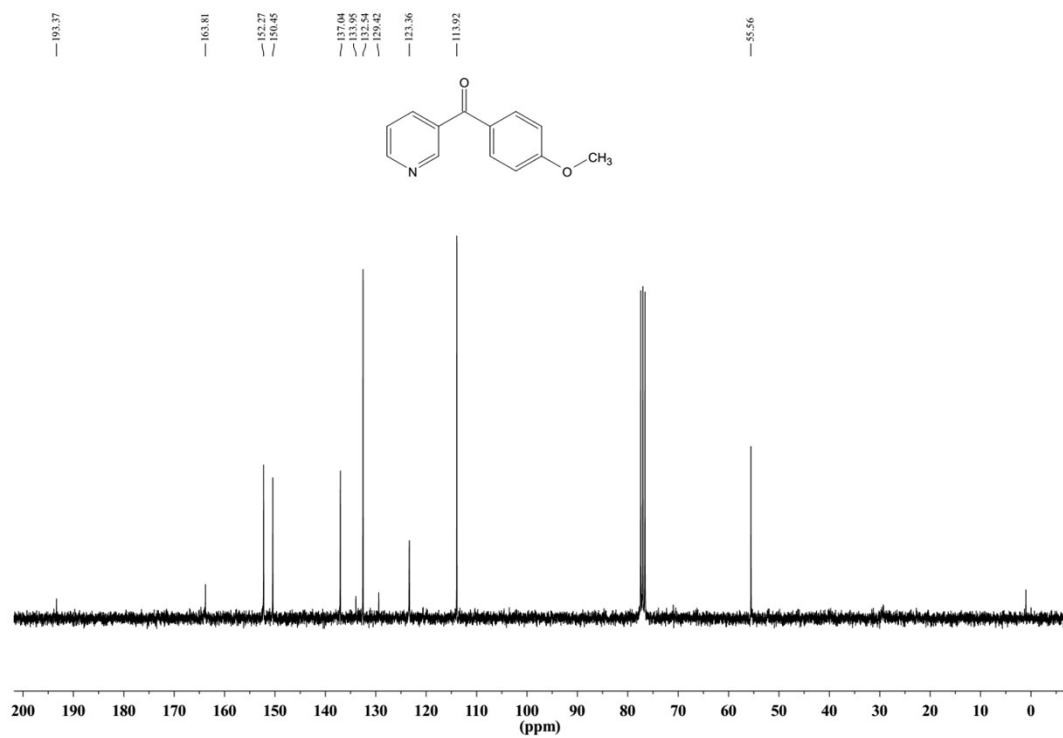

## References

- 1 J. F. Wei, J. Jiao, J. J. Feng, J. Lv, X. R. Zhang, X. Y. Shi, Z. G. Chen, *J. Org. Chem.*, 2009, **74**, 6283-6286.
- 2 M. Al-Amin, M. Akimoto, T. Tameno, Y. Ohki, N. Takahashi, N. Hoshiya, S. Shuto, M. Arisawa, *Green Chem.*, 2013, **15**, 1142-1145.
- 3 R. Martínez, I. M. Pastor, M. Yus, *European J. Org. Chem.*, 2014, **4**, 872-877.
- 4 W. Erb, M. Albini, J. Rouden, J. Blanchet, *J. Org. Chem.*, 2014, **79**, 10568-10580.
- 5 K. Ueura, T. Satoh, M. Miura, *Org. Lett.*, 2005, **7**, 2229-2231.
- 6 S. L. Mao, Y. Sun, G. A. Yu, C. Zhao, Z. J. Han, J. Yuan, X. Zhu, Q. Yang, S. H. Liu, *Org. Biomol. Chem.*, 2012, **10**, 9410-9417.
- 7 H. Jasch, J. Scheumann, M. R. Heinrich, *J. Org. Chem.*, 2012, **77**, 10699-10706.
- 8 B. T. King, J. Kroulik, C. R. Robertson, P. Rempala, C. L. Hilton, J. D. Korinek, L. M. Gortari, *J. Org. Chem.*, 2007, **72**, 2279-2288.
- 9 X. Li, G. Zou, *Chem. Commun.*, 2015, **51**, 5089-5092.
- 10 Y. Zhong, W. Han, *Chem. Commun.*, 2014, **50**, 3874-3877.
- 11 D. Lee, T. Ryu, Y. Park, P. H. Lee, *Org. Lett.*, 2014, **16**, 1144-1147.
- 12 W. S. Bechara, G. Pelletier, A. B. Charette, *Nature Chem.*, 2012, **4**, 228-234.
- 13 K. Kato, S. Ohkawa, S. Terao, Z. Terashita, K. Nishikawa, *J. Med. Chem.*, 1985, **28**, 287-294.
